# Supplementary material
Source: ML conference proceedings conference paper supplement (https://openreview.net/forum?id=r5IEvvIs9xq)
Supplement: supplementary_material [file attachment]

TuRBO + Chebyshev Scalarizations on DTLZ2

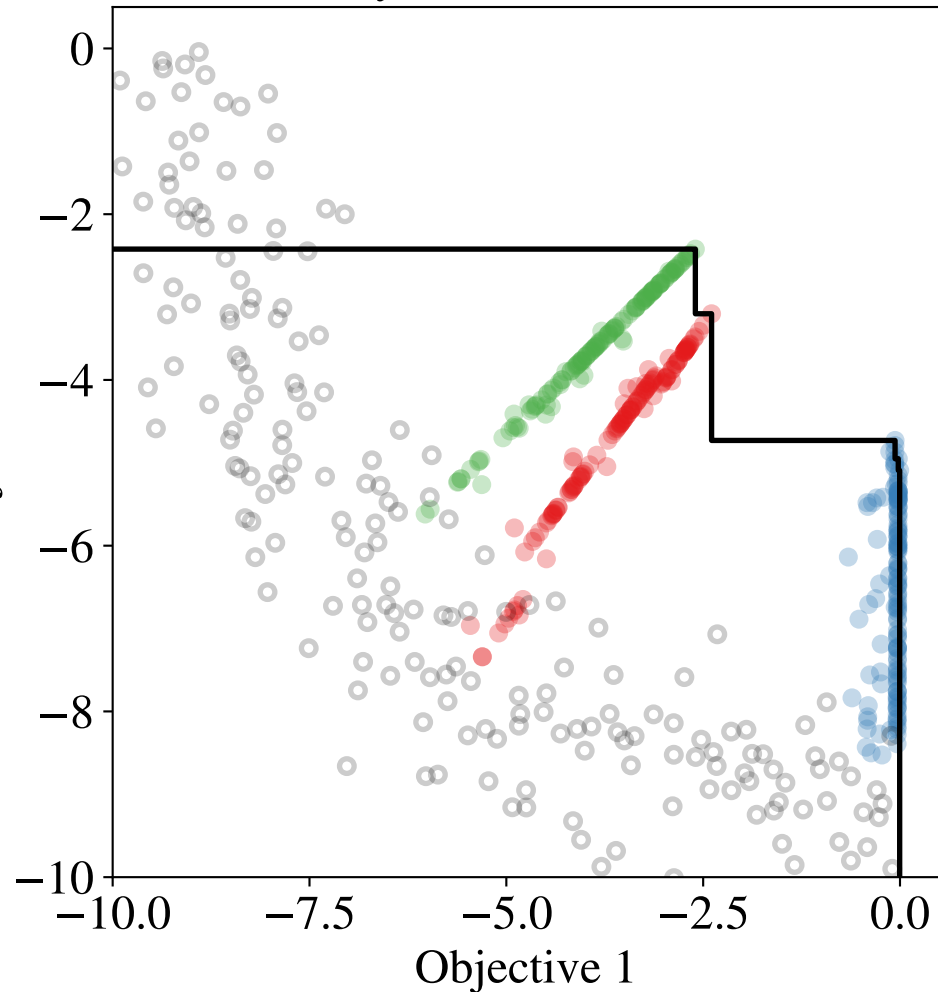

MORBO on DTLZ2

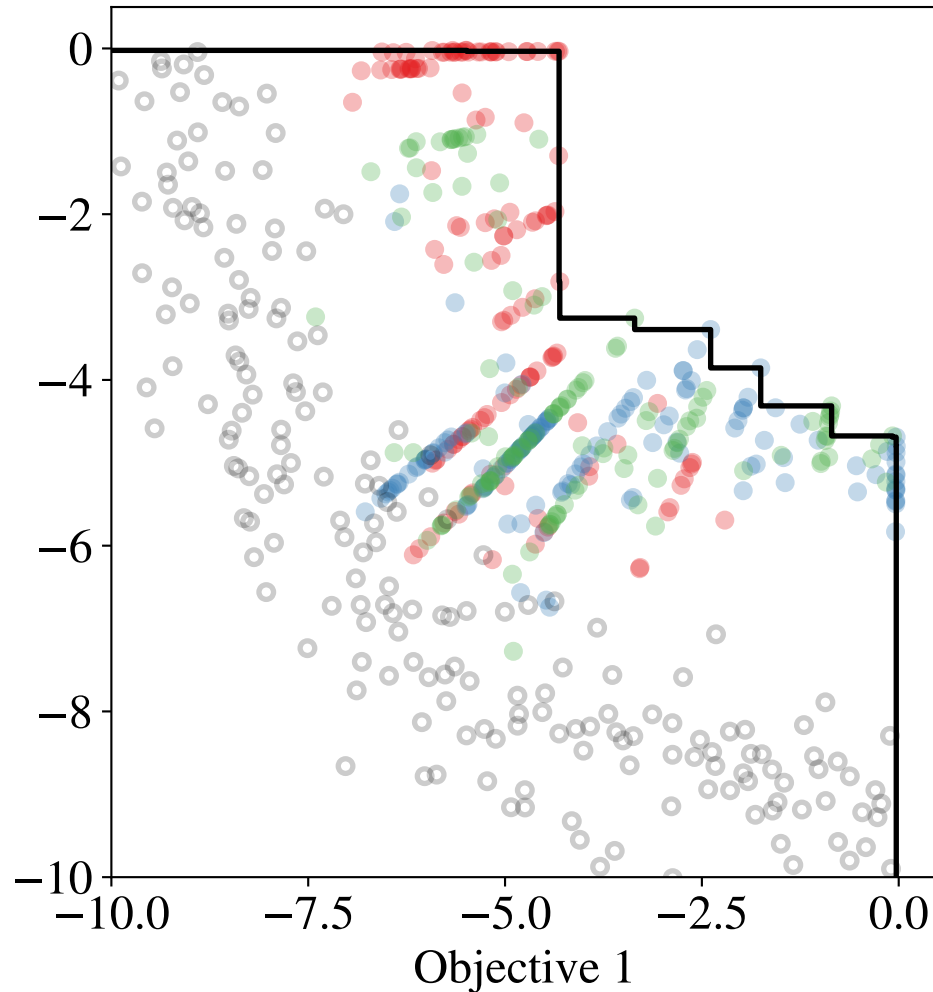

MORBO on MW7

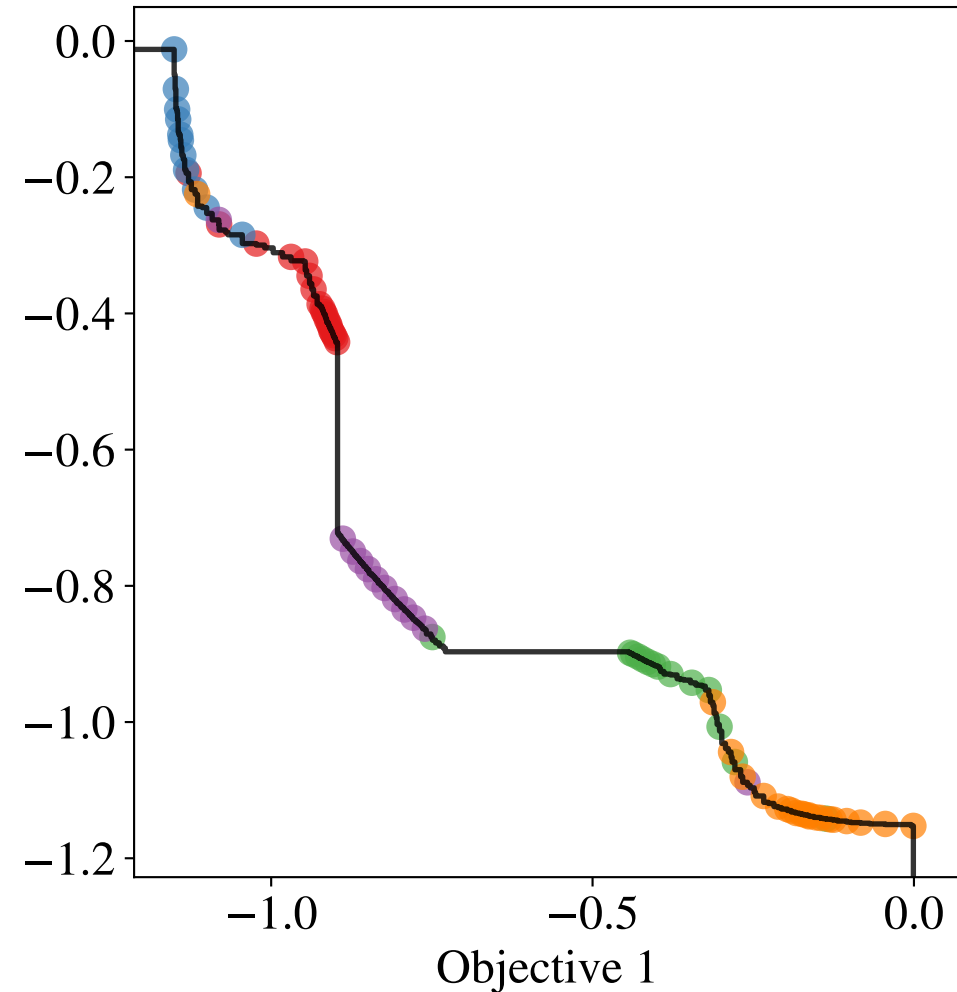

— Pareto Frontier    ○ Initial Points    ● Trust Region 1    ● Trust Region 2    ● Trust Region 3    ● Trust Region 4    ● Trust Region 5
