# Supplementary material
Source: ML conference proceedings conference paper supplement (https://openreview.net/forum?id=r5IEvvIs9xq)

Vehicle Safety

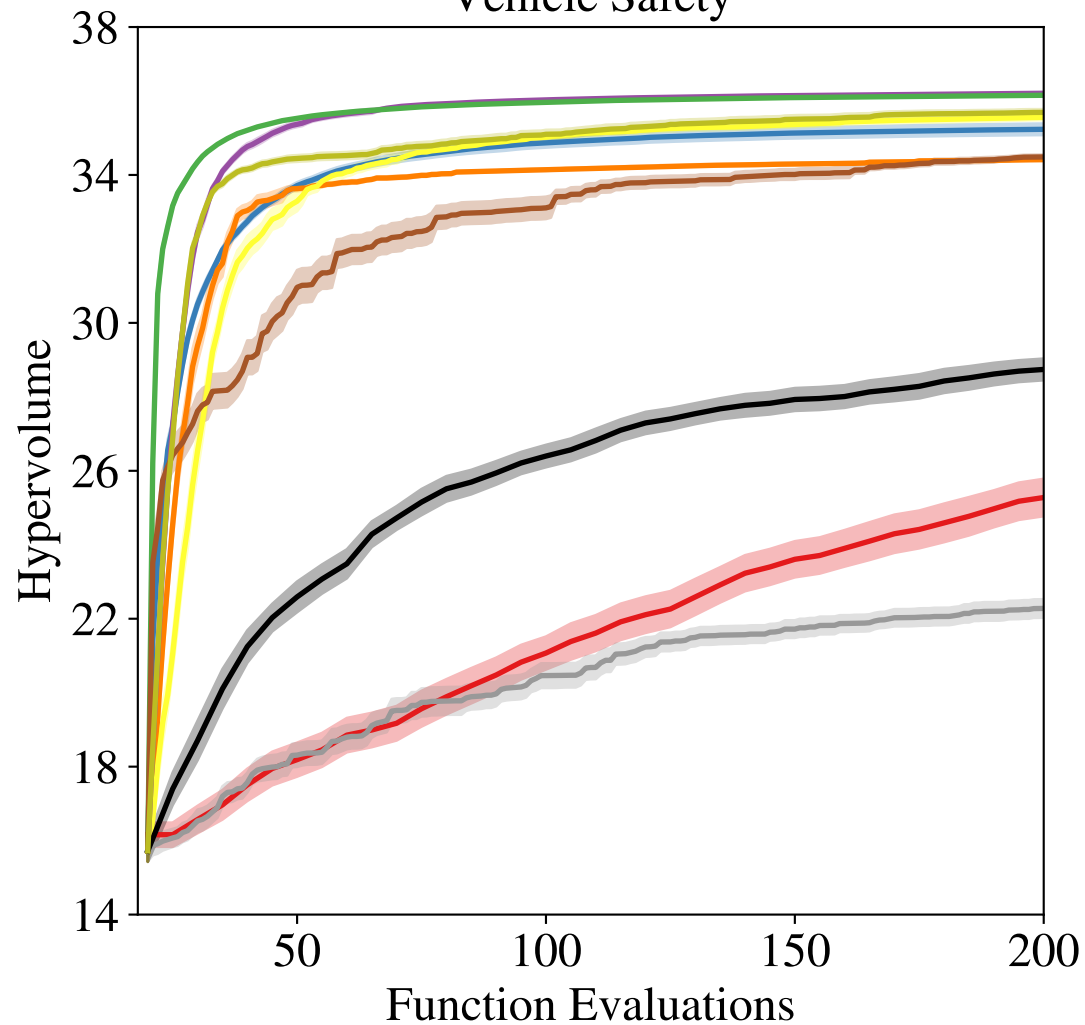

Welded Beam

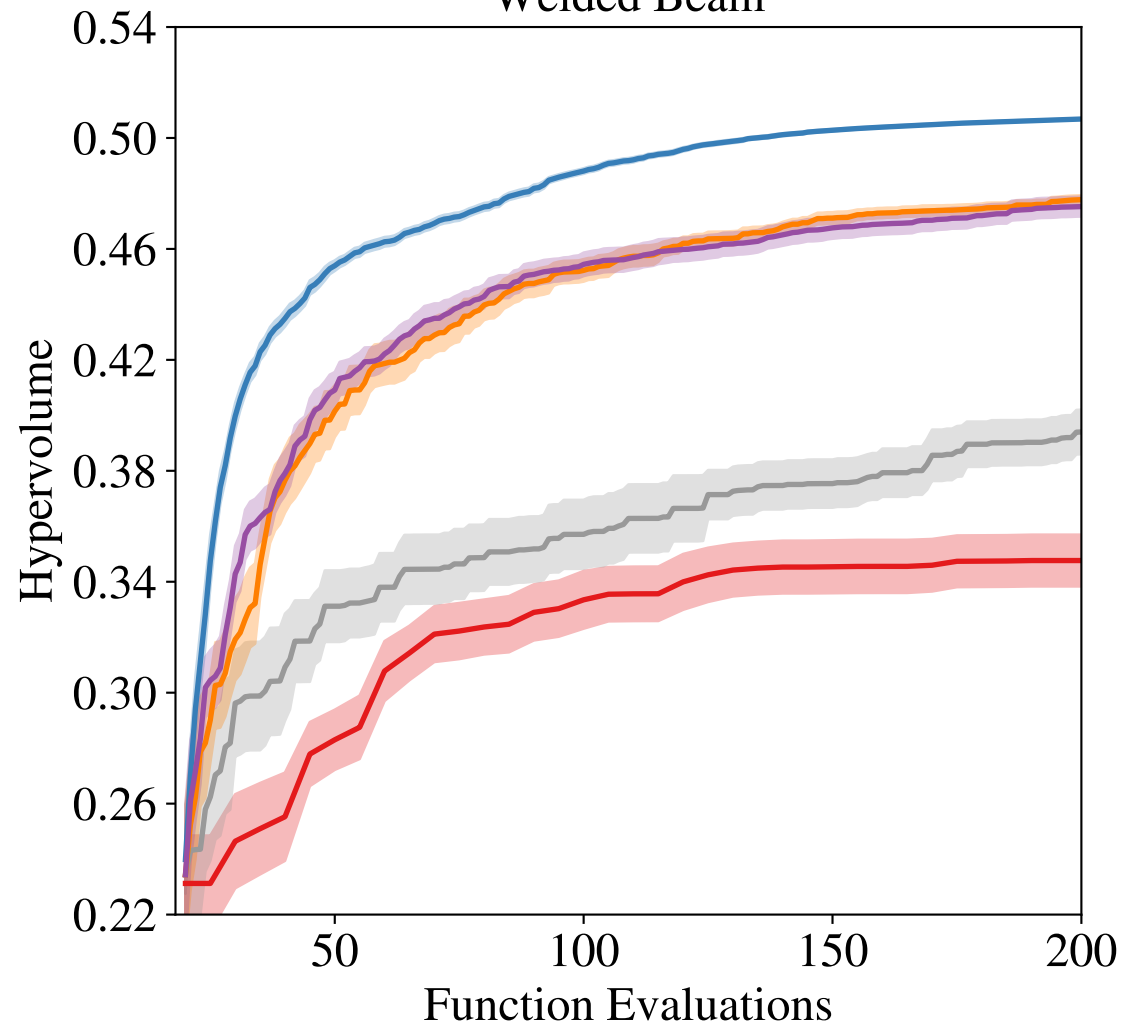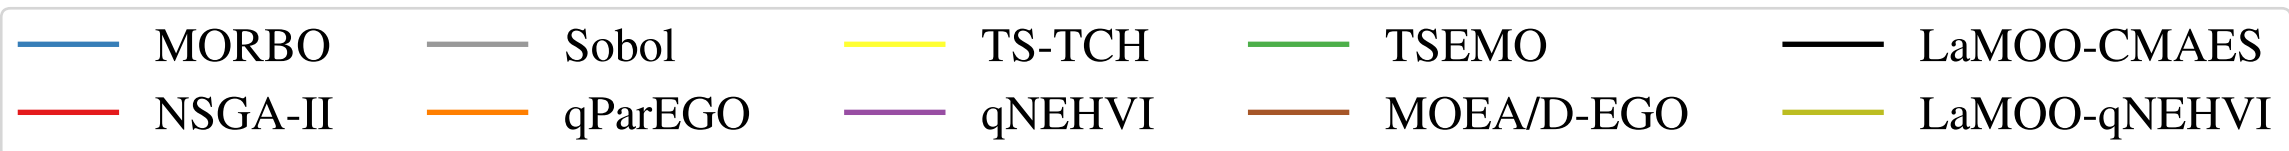

Supplement: supplementary_material [file attachment]

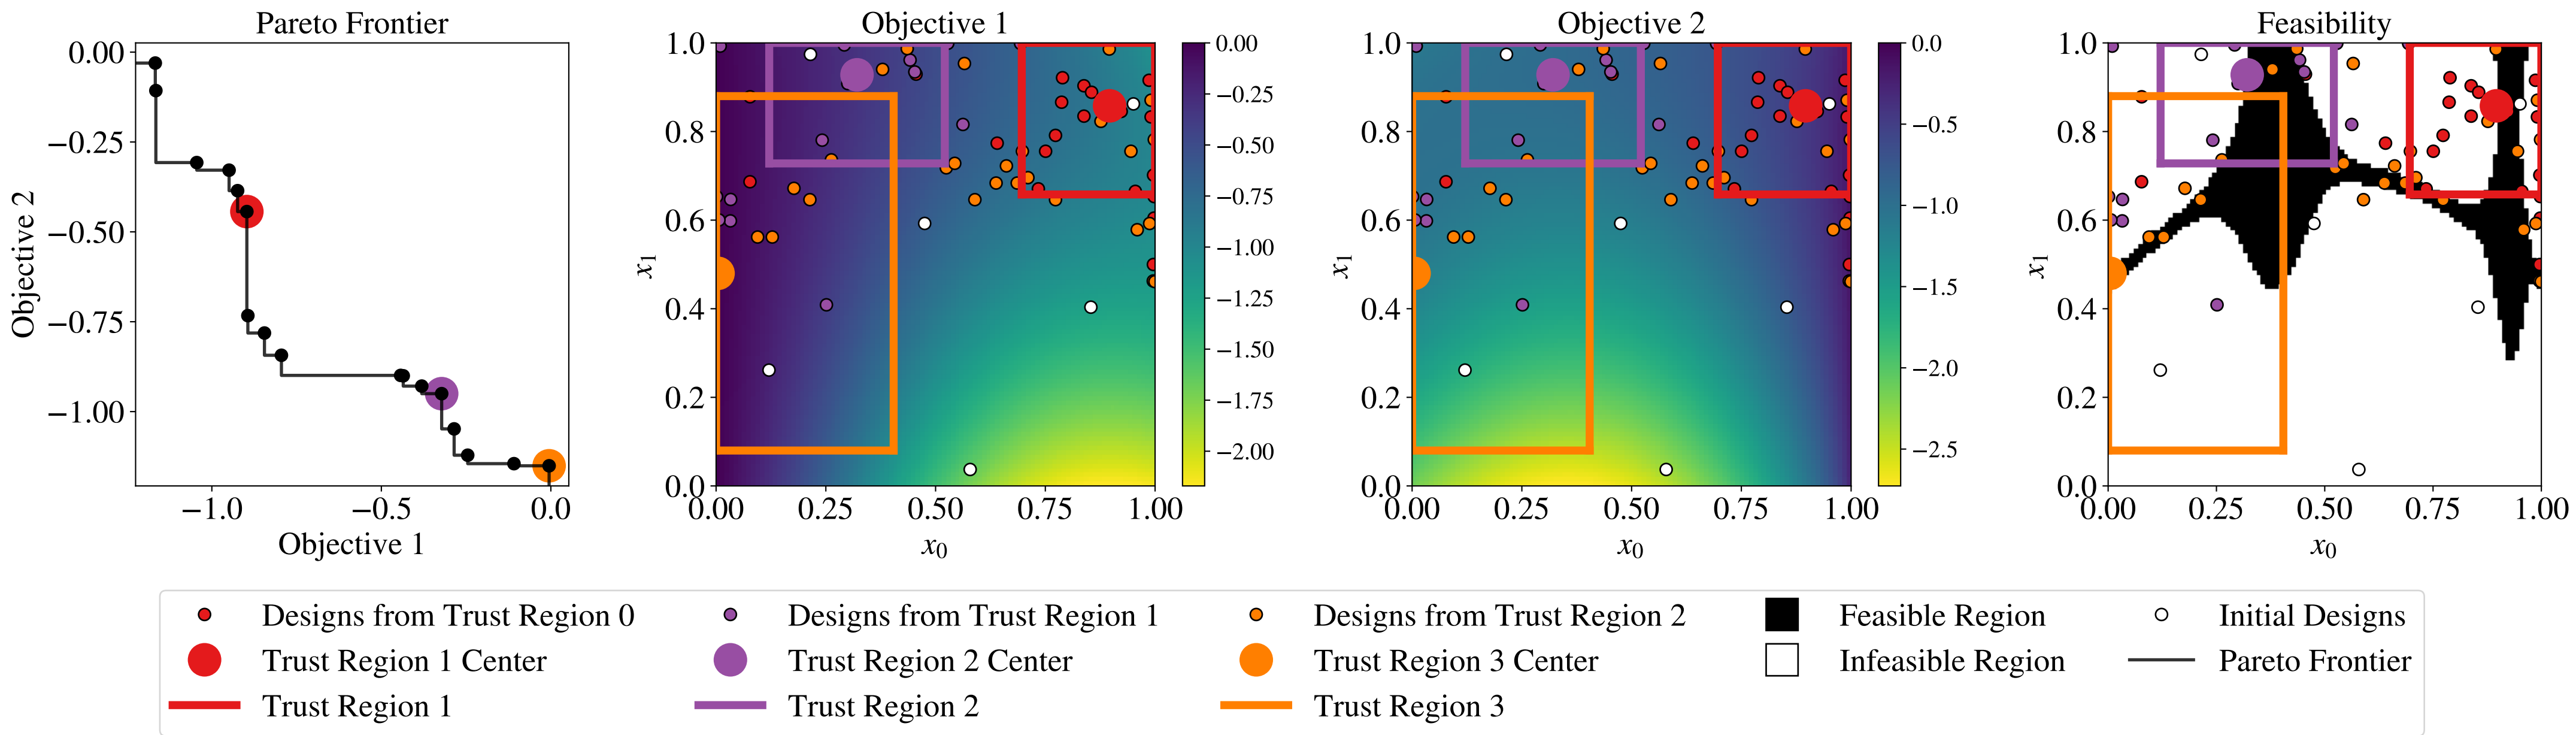

Supplement: supplementary_material [file attachment]

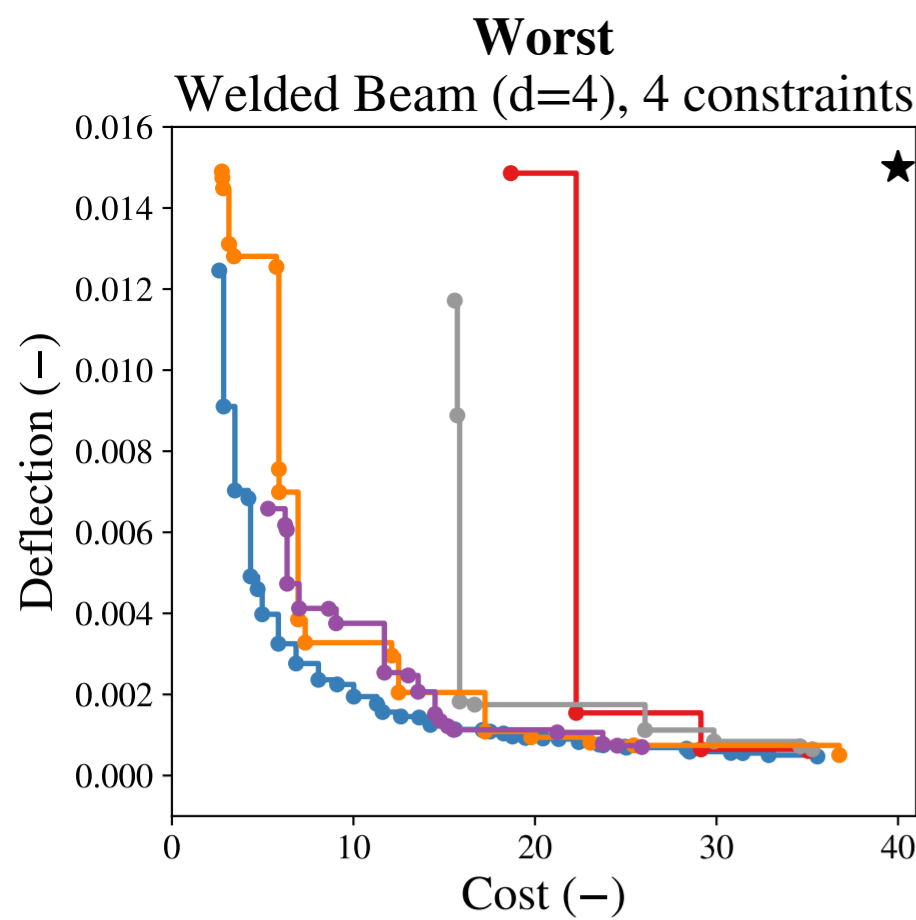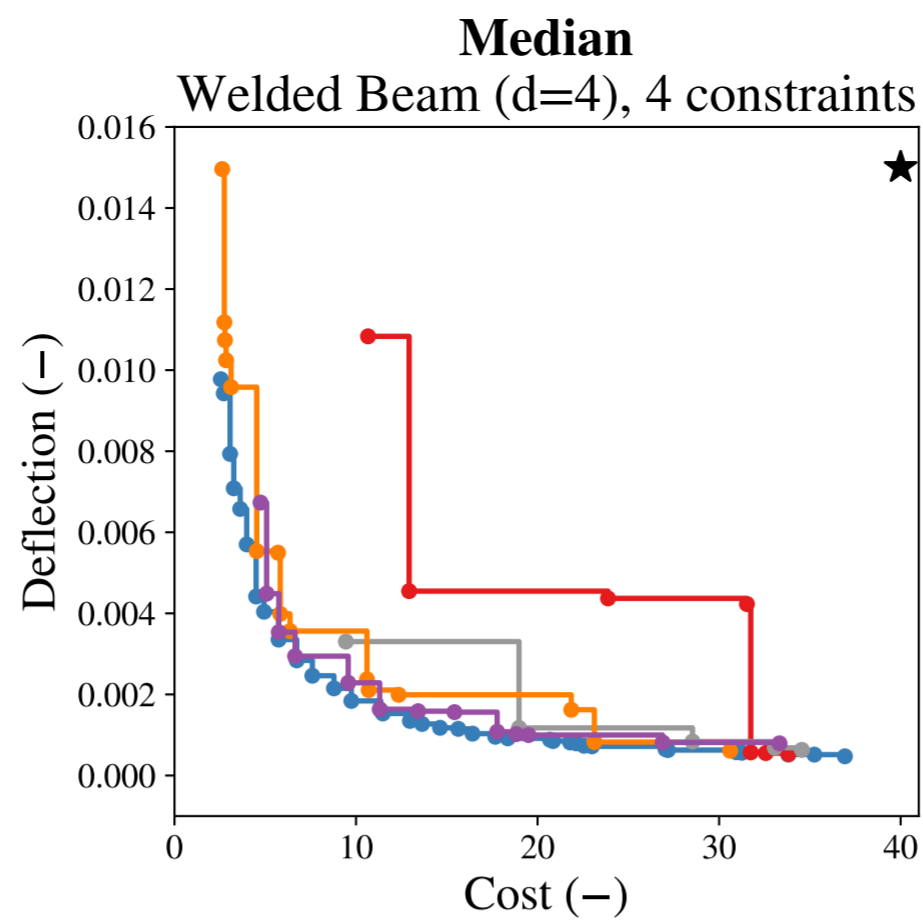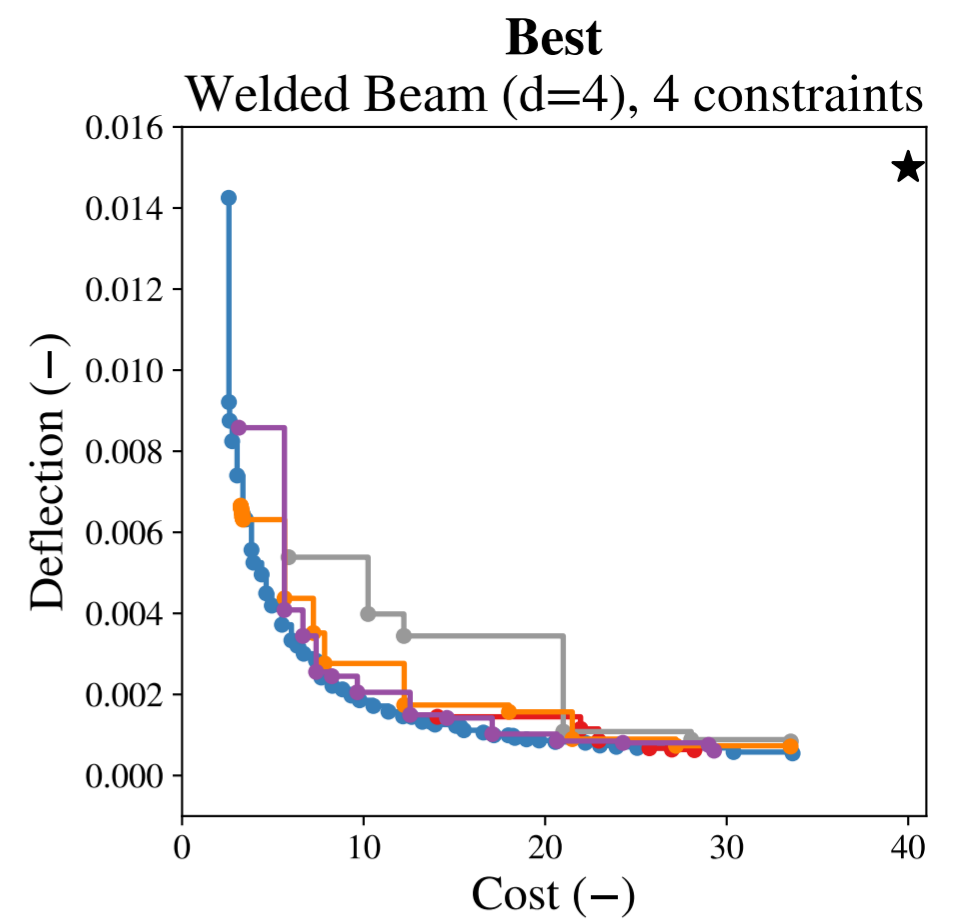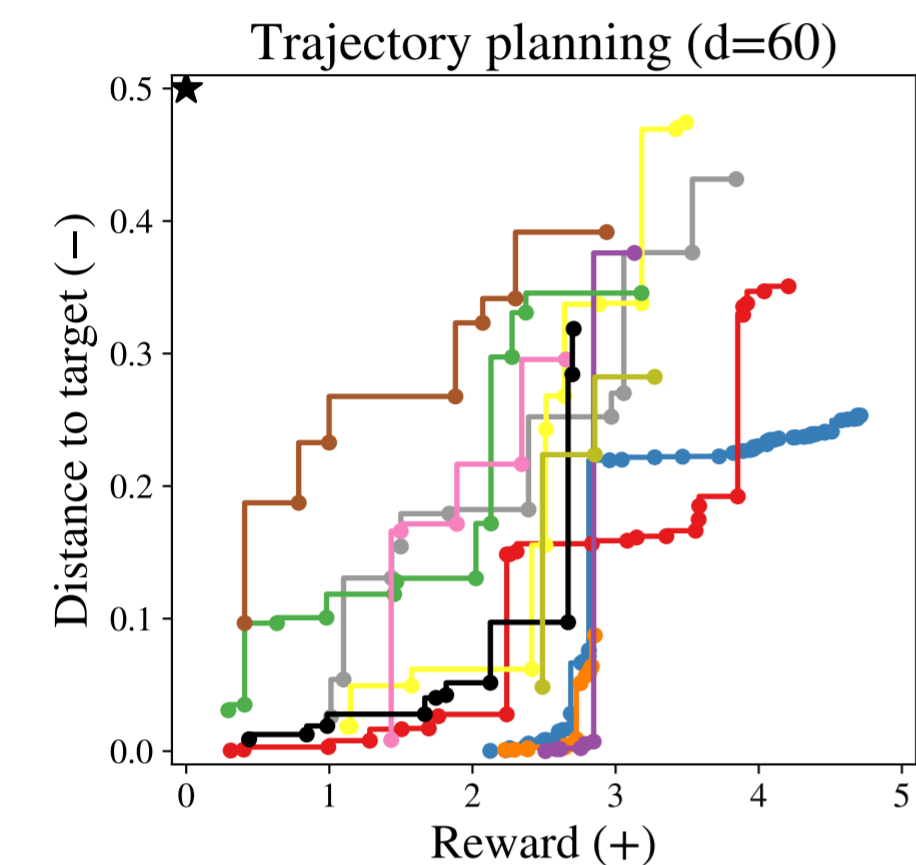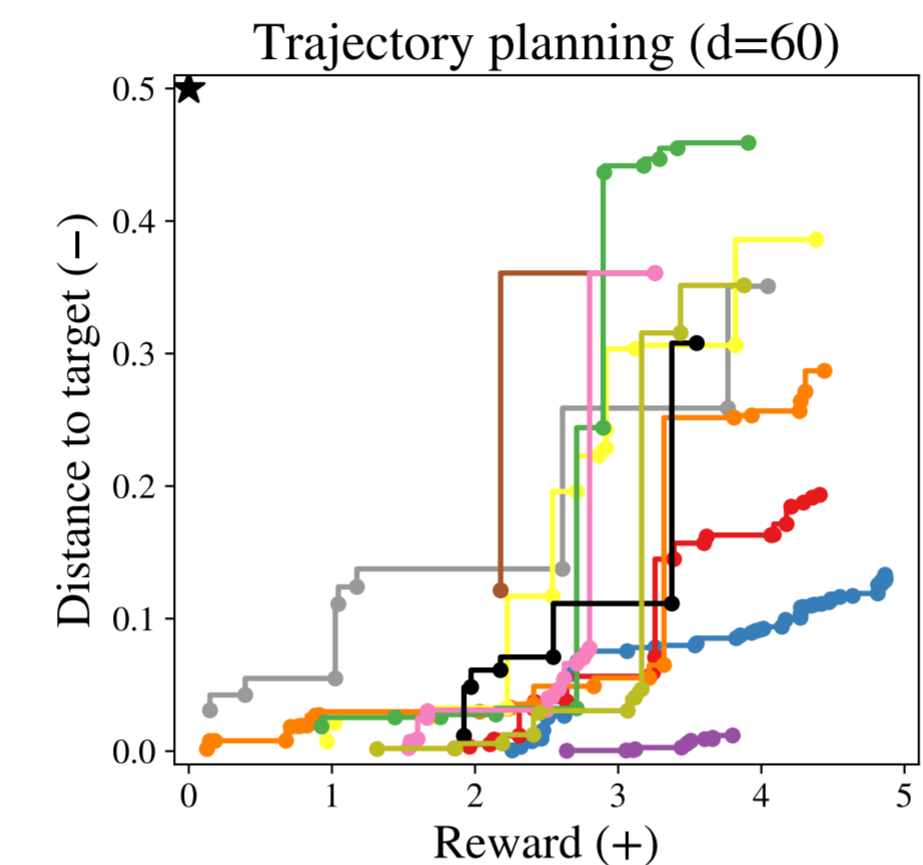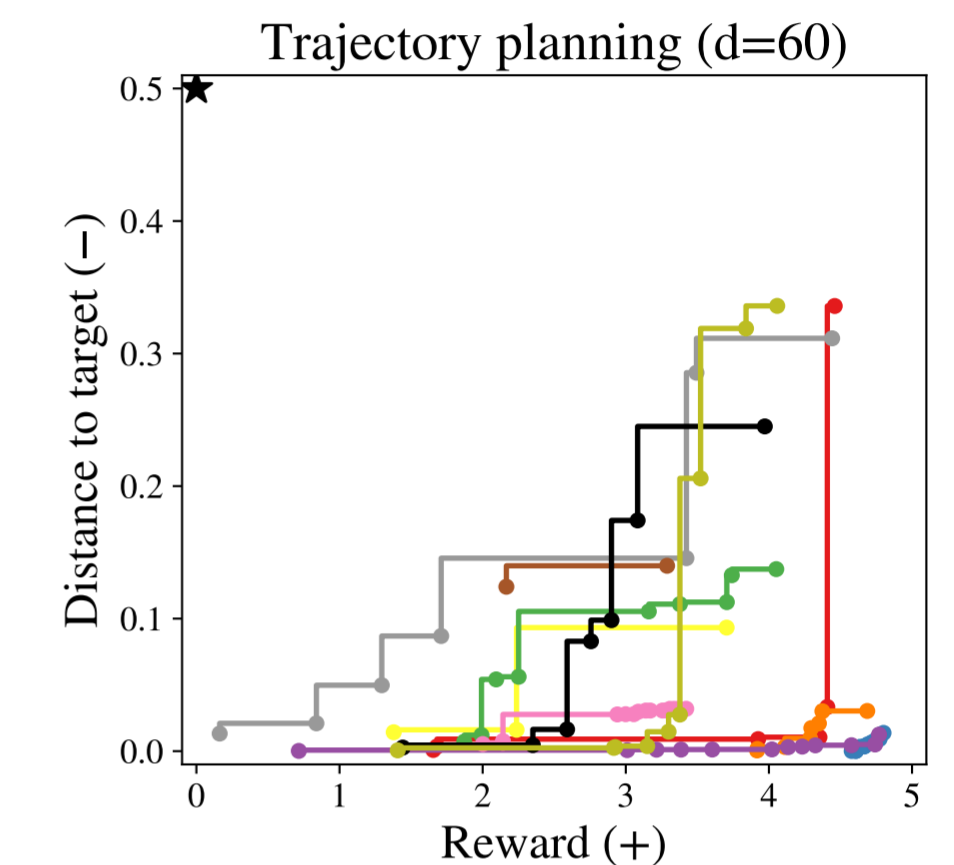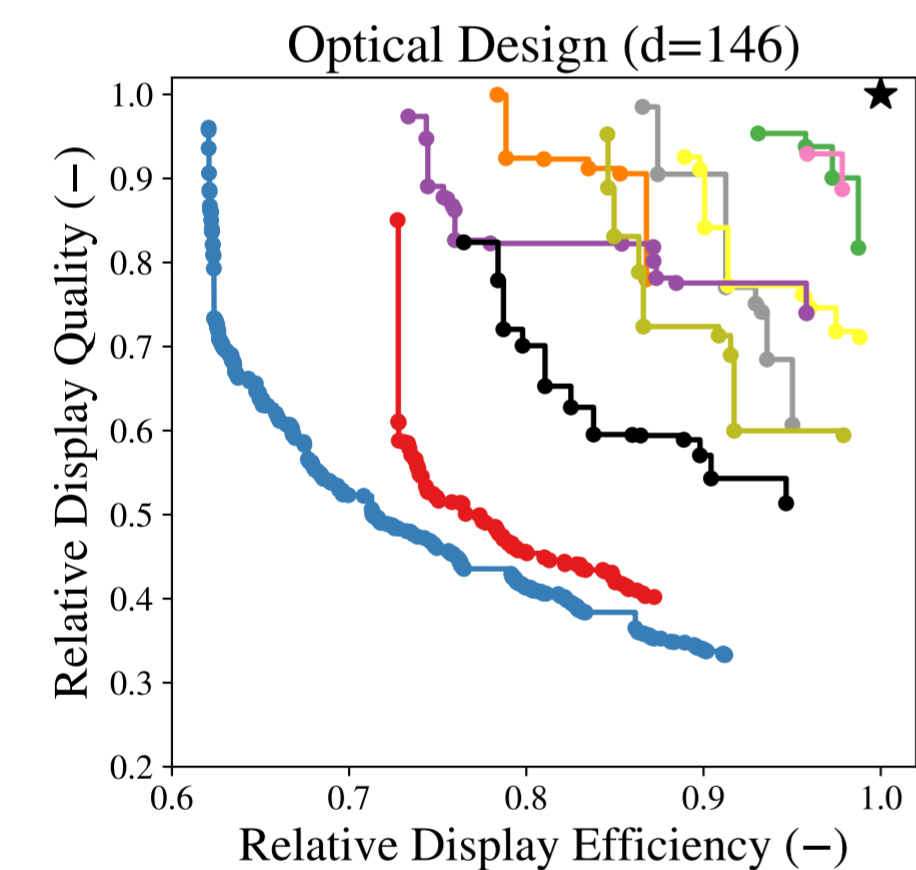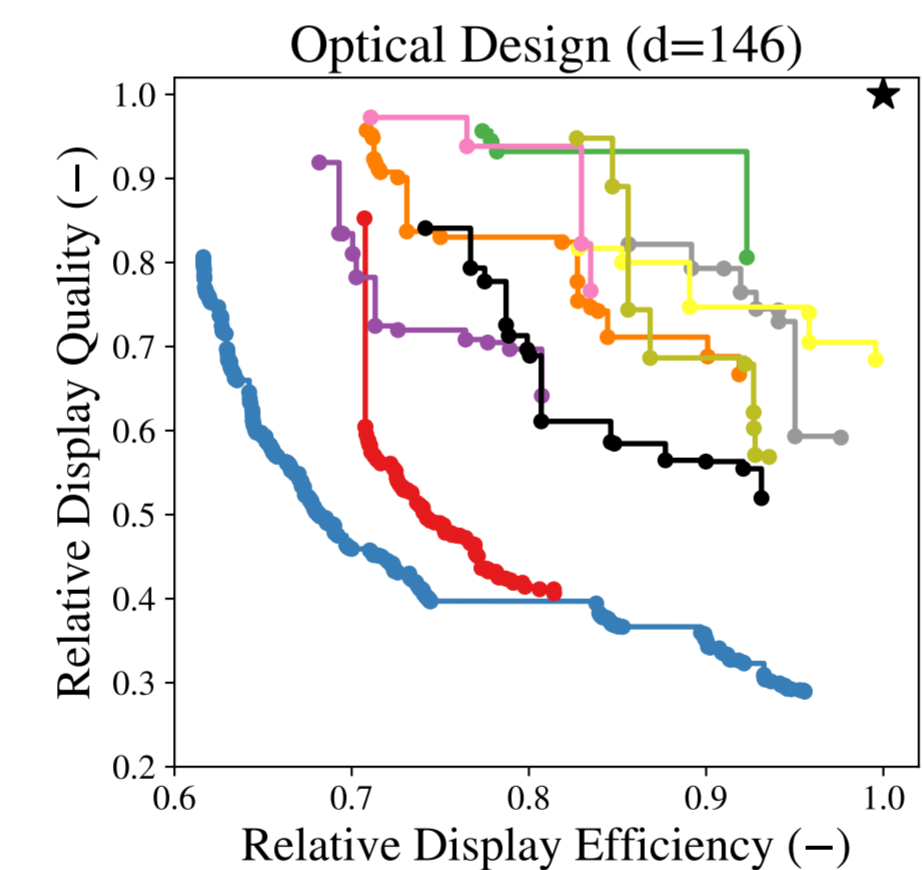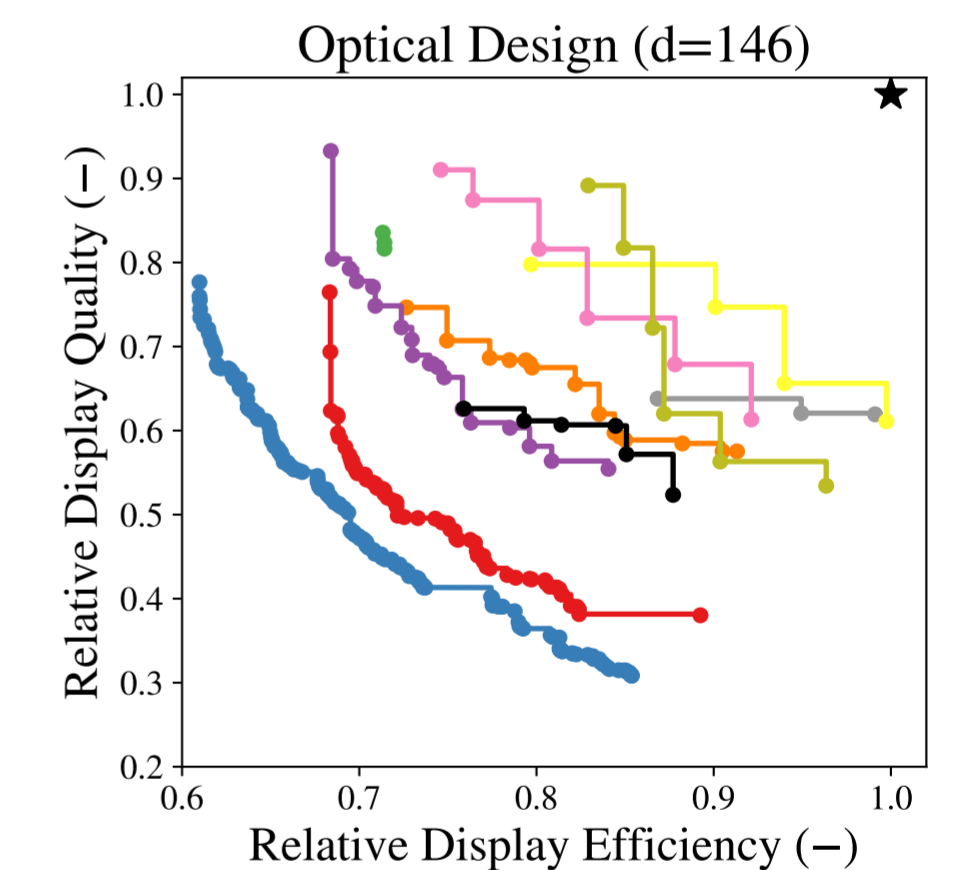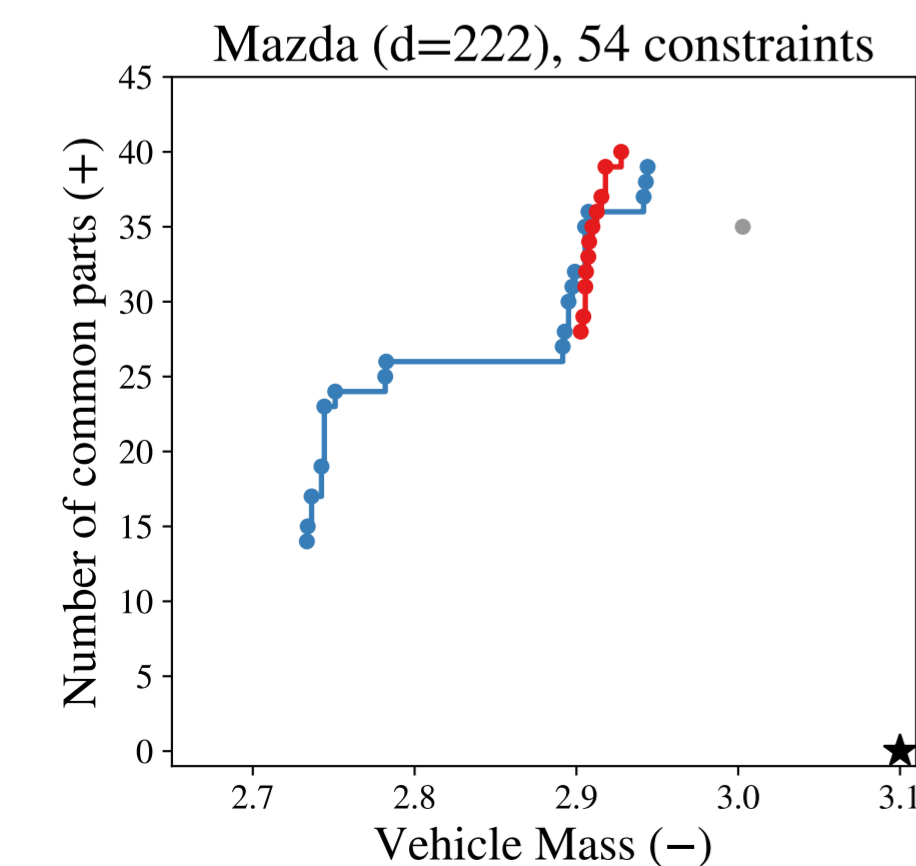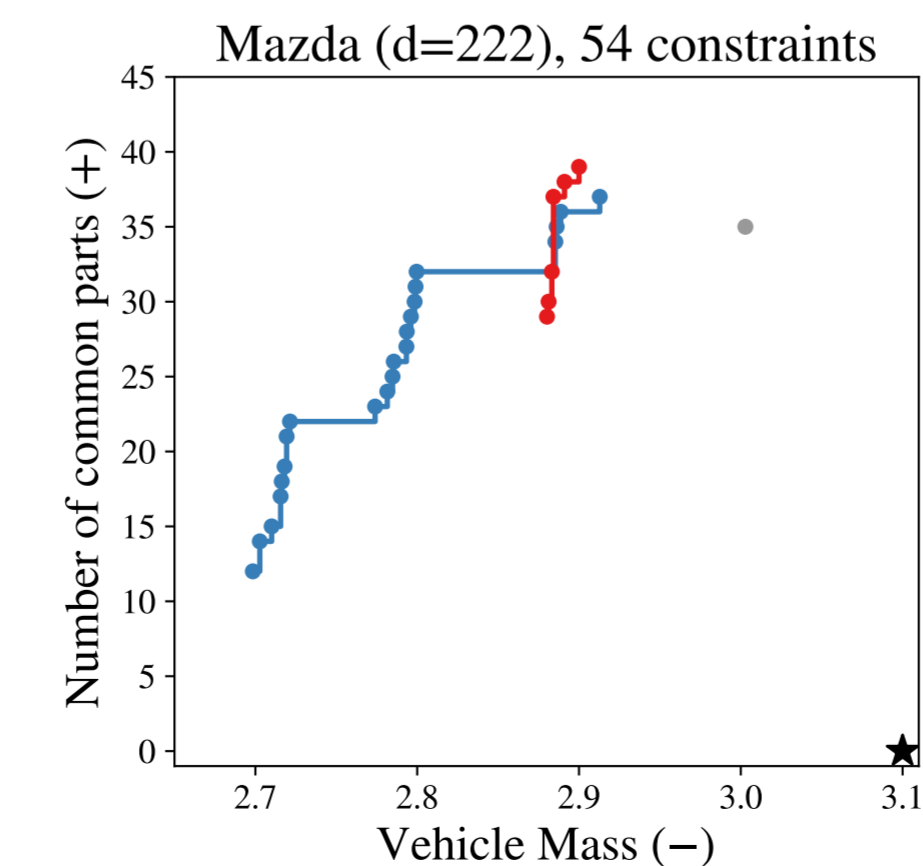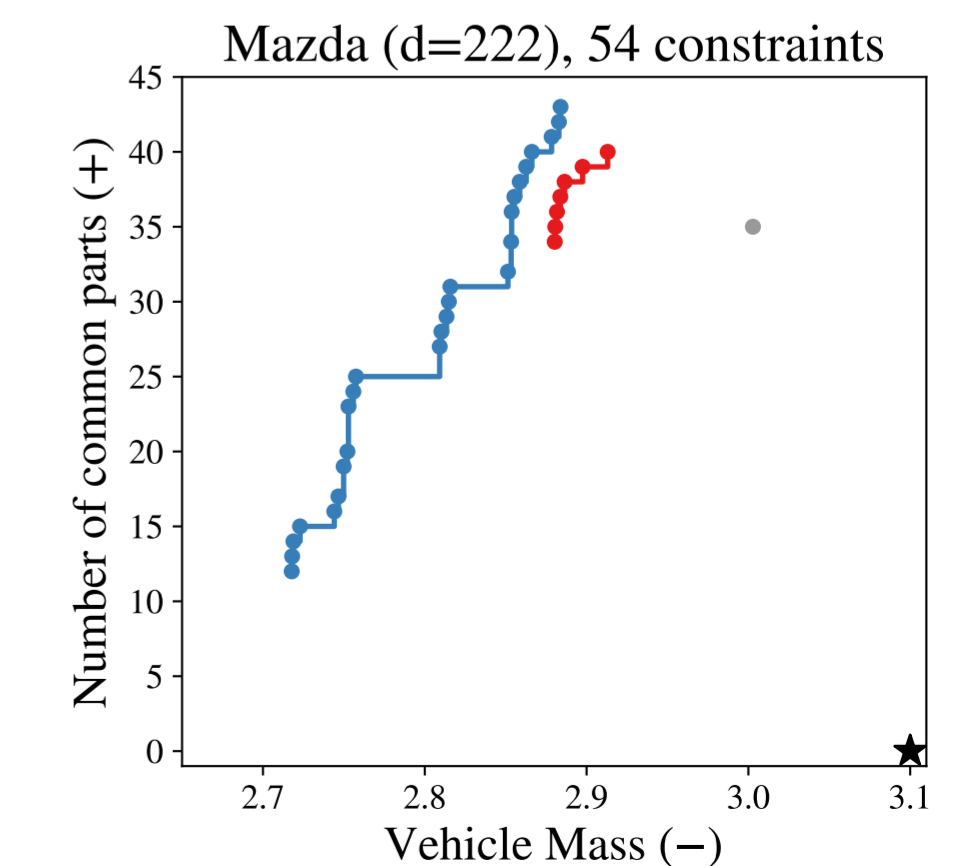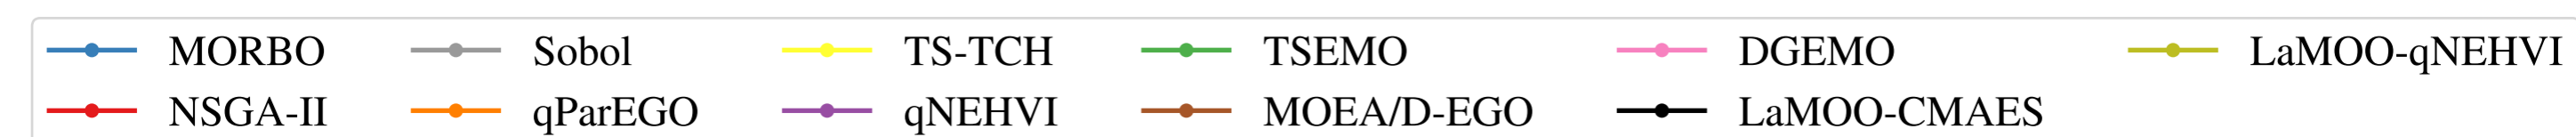

Supplement: supplementary_material [file attachment]

DTLZ2

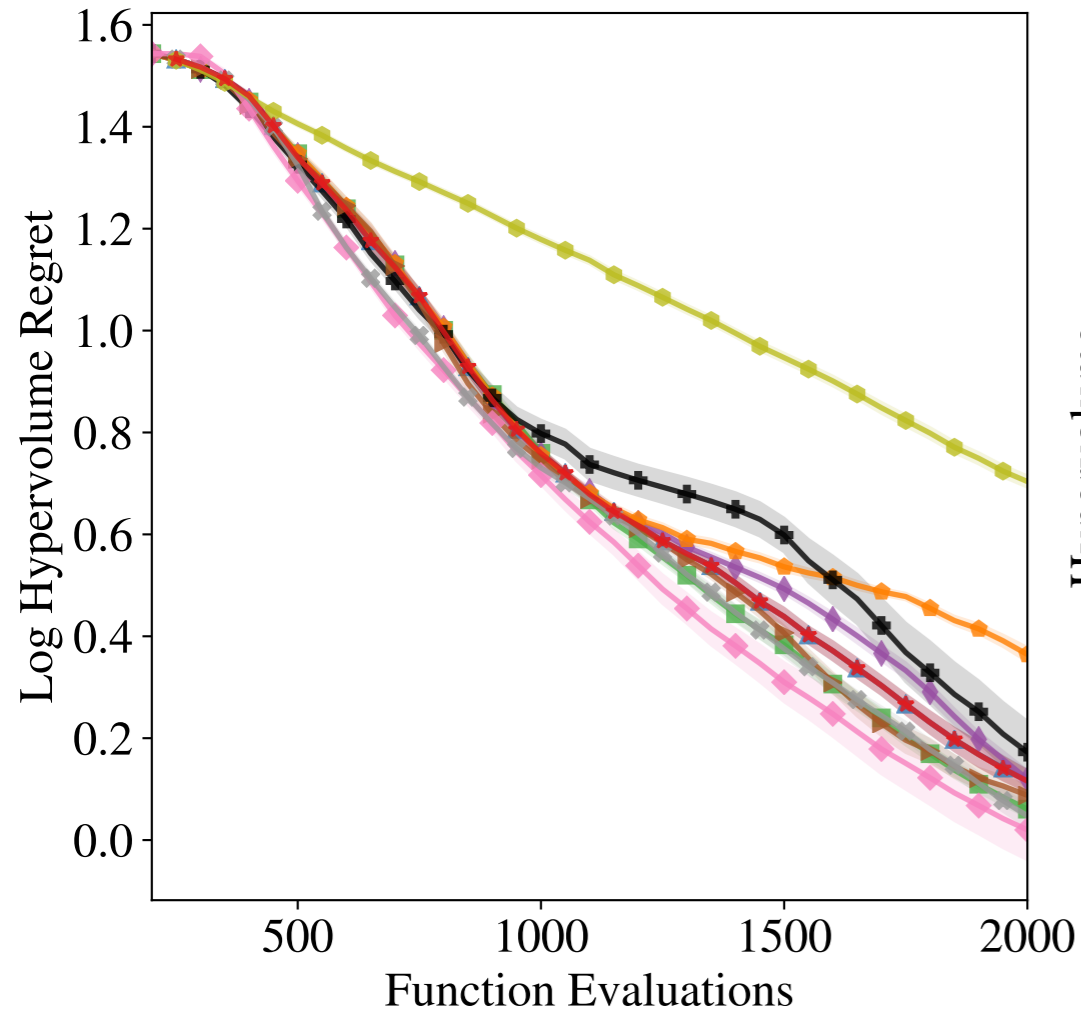

Trajectory planning

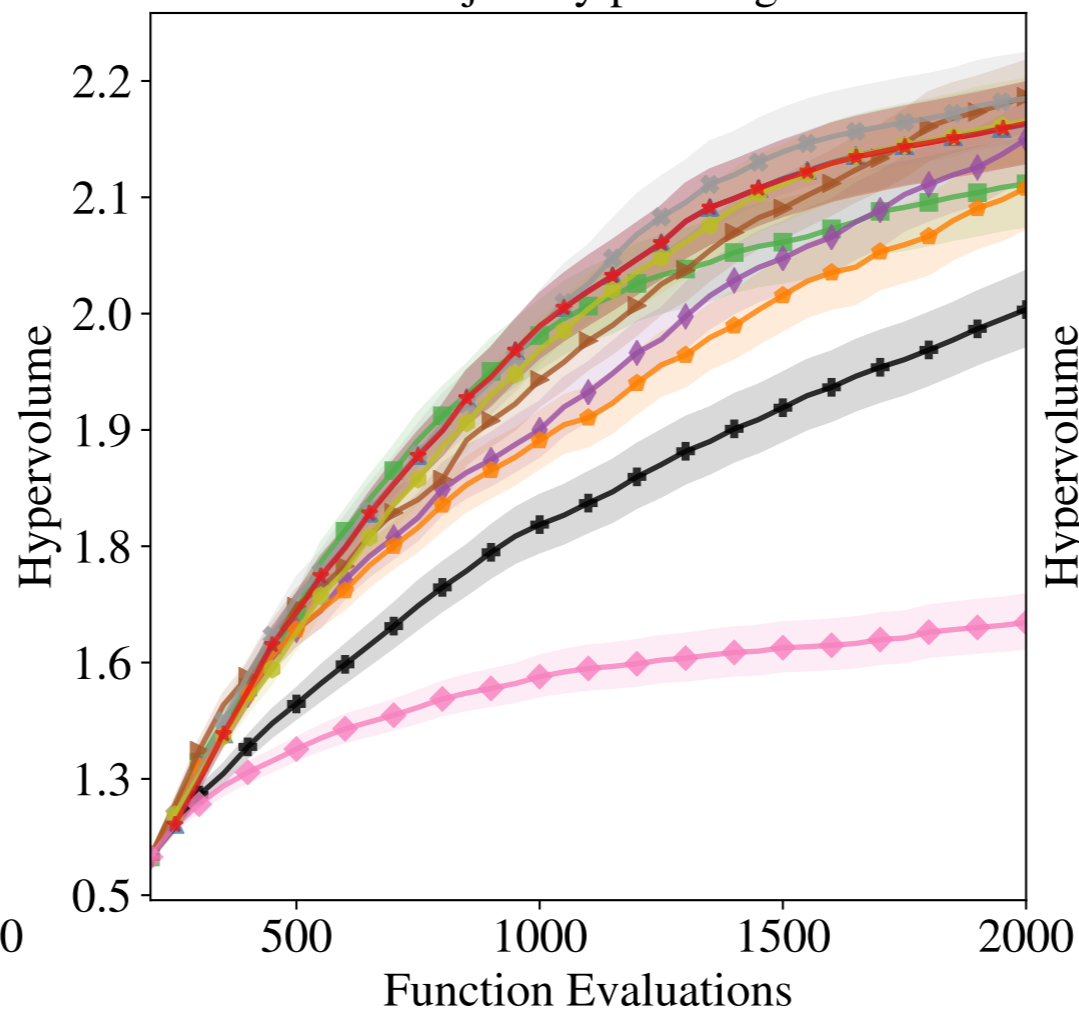

Optical Design

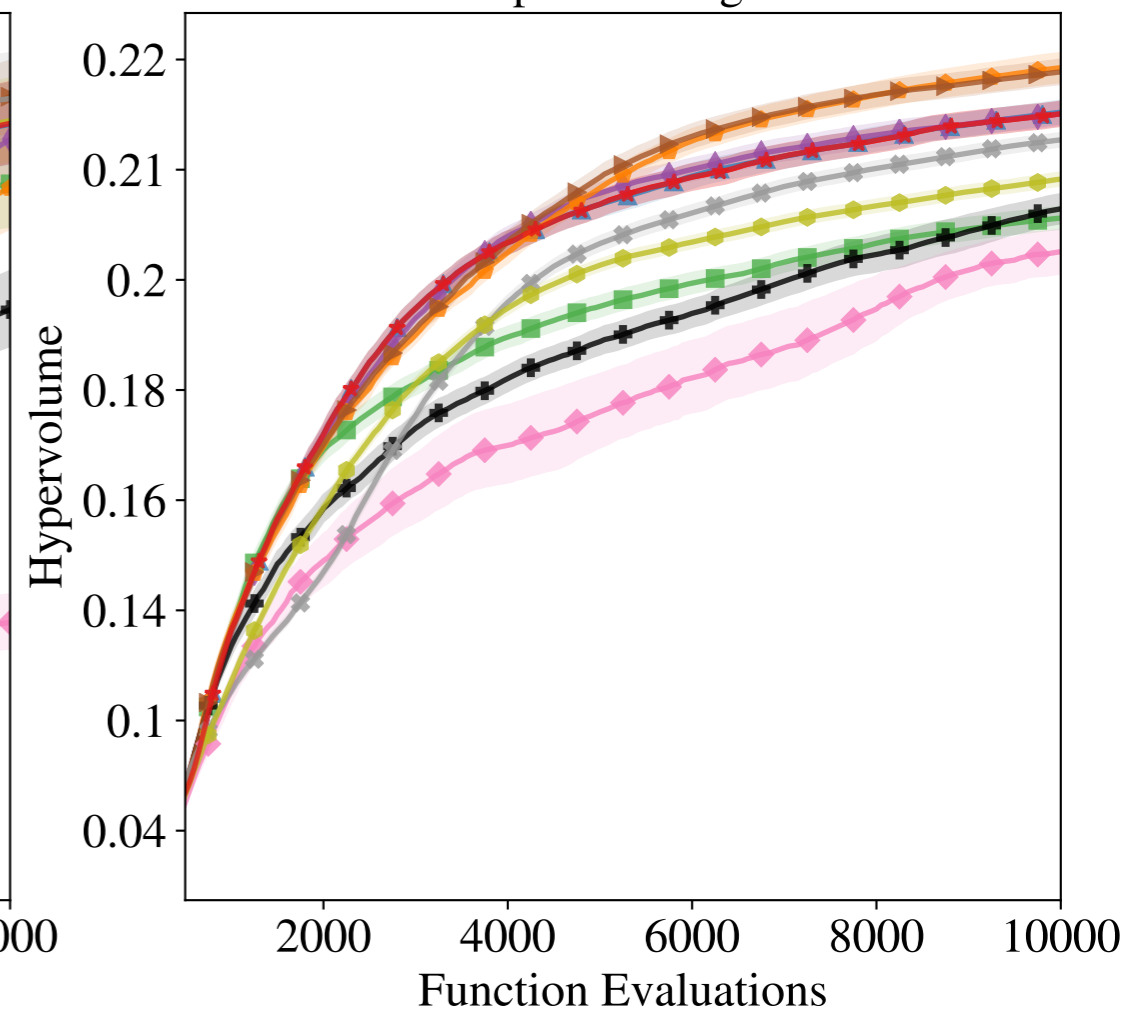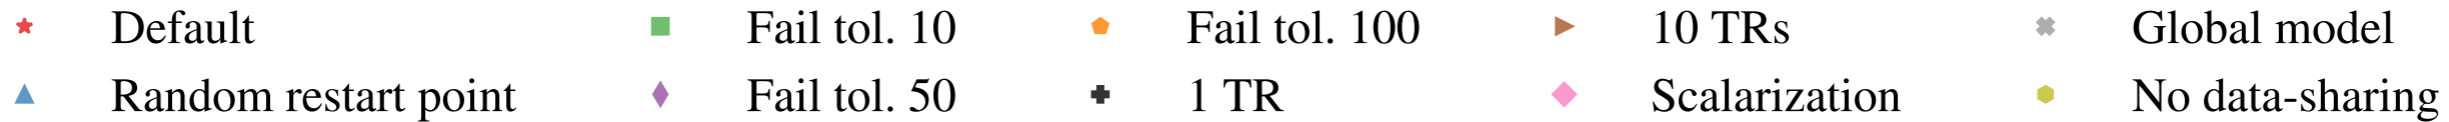

Supplement: supplementary_material [file attachment]

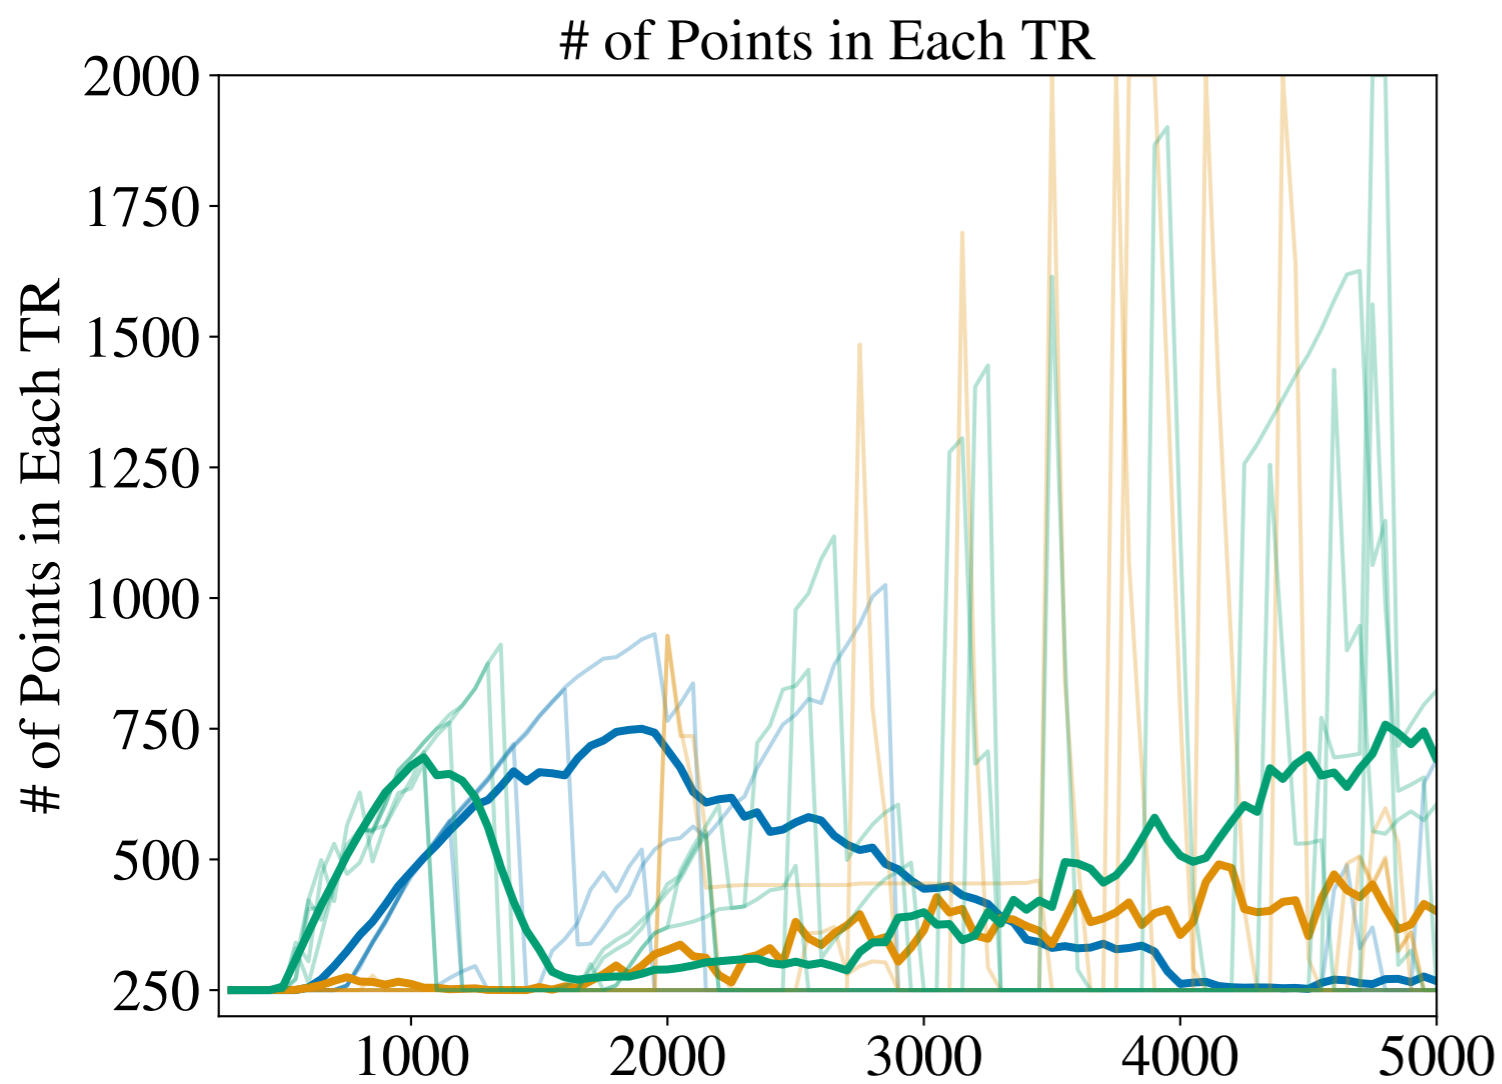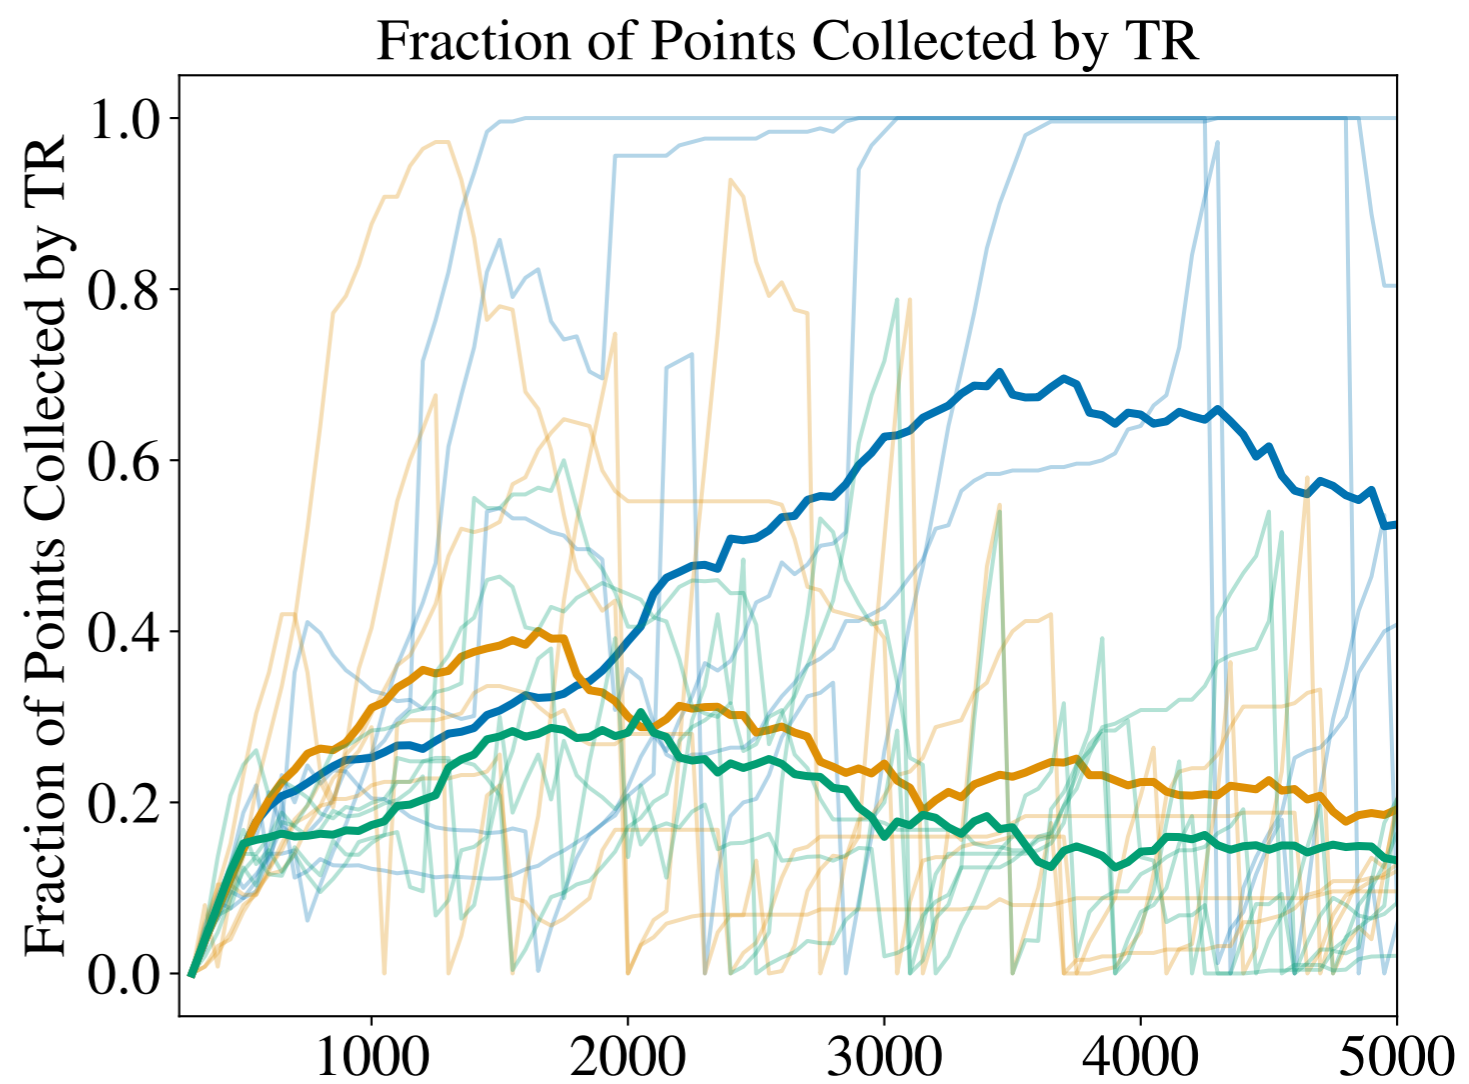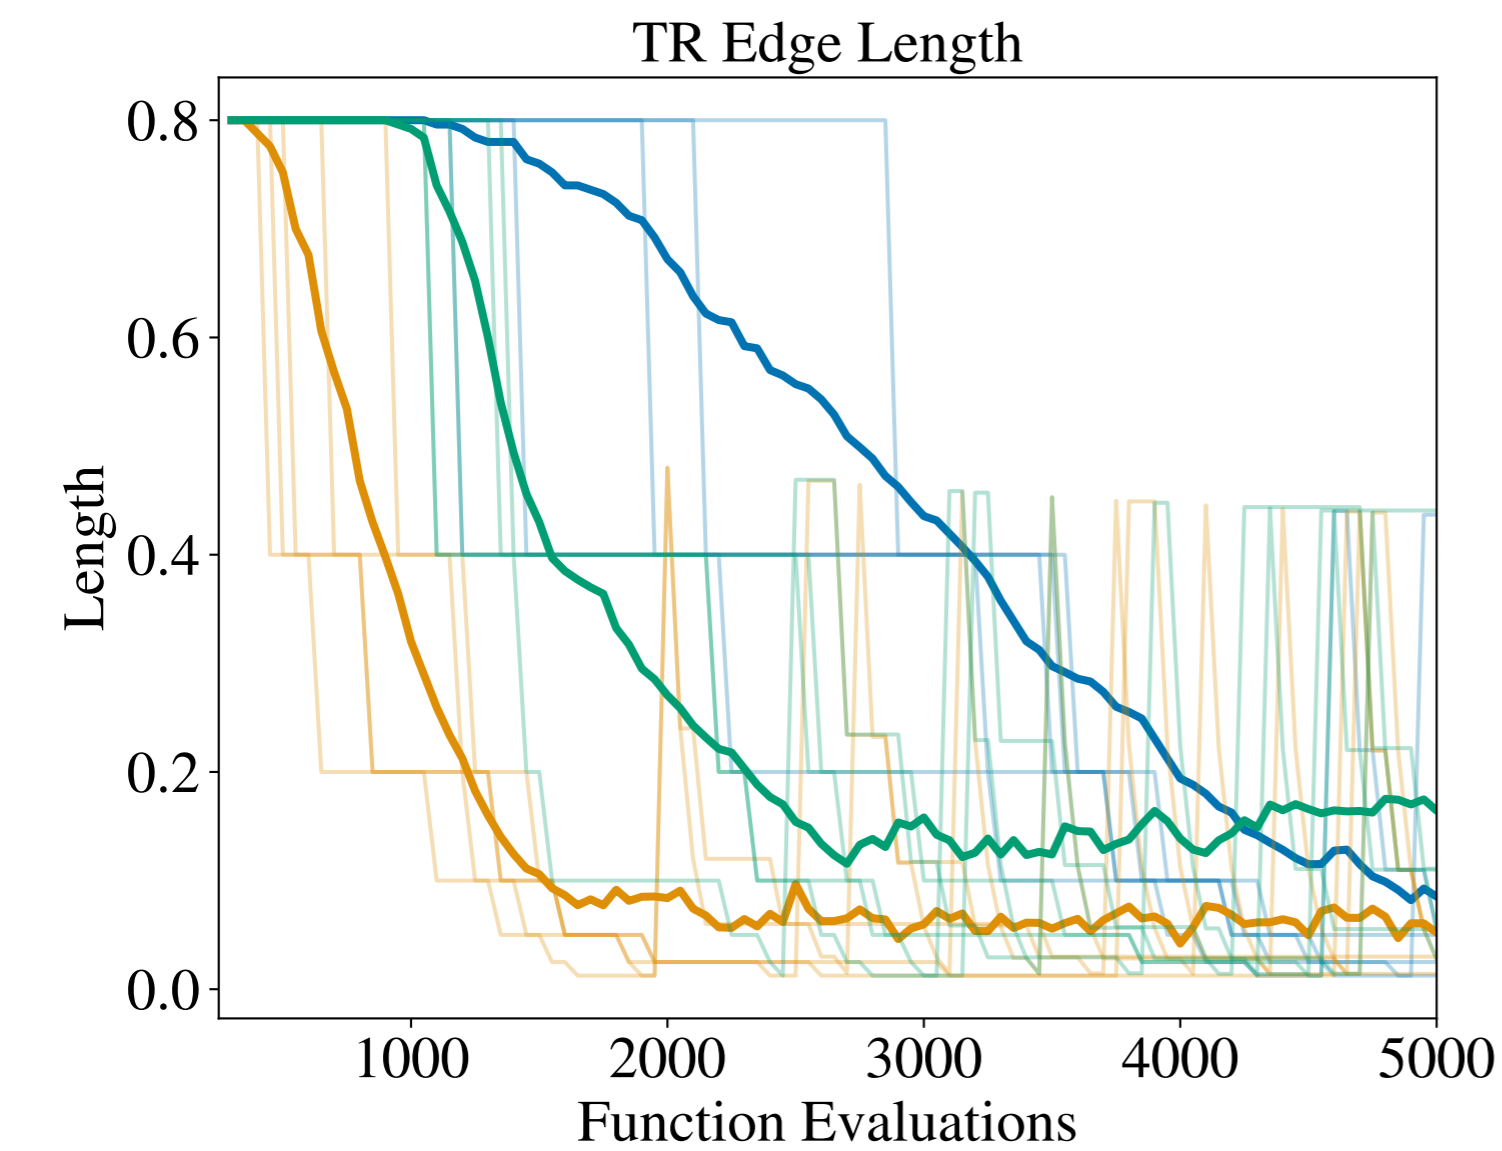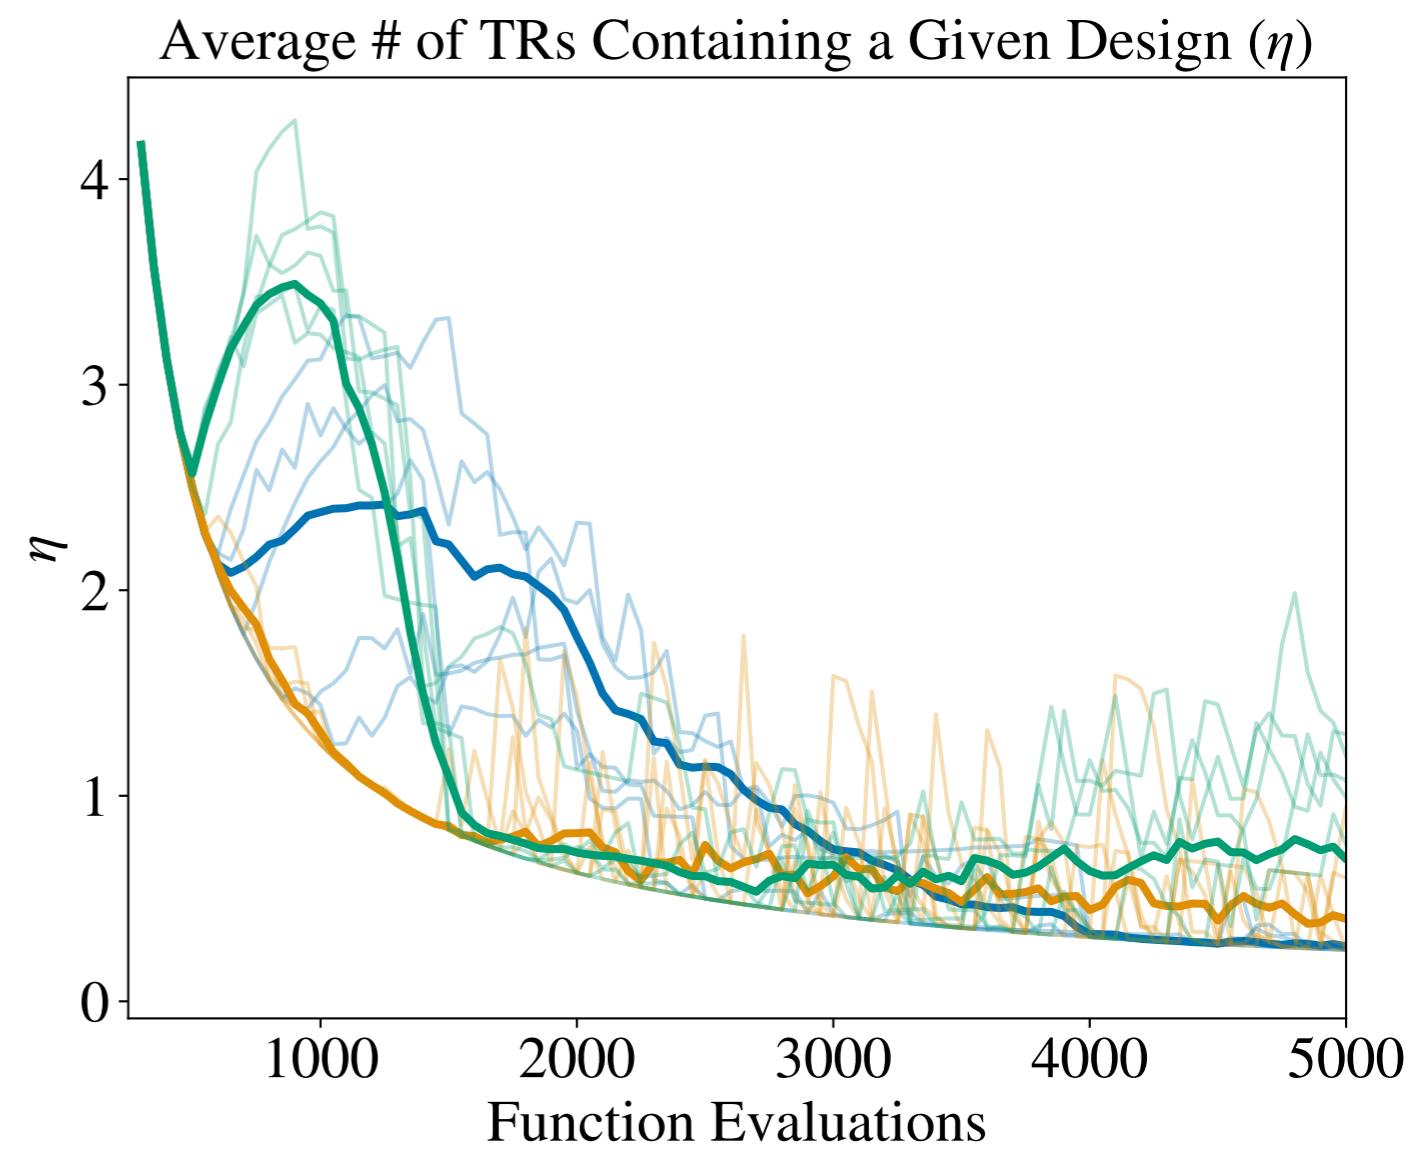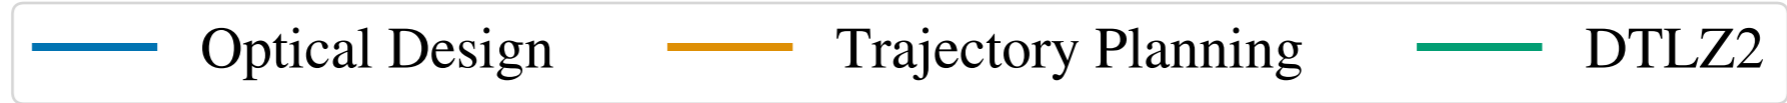

Supplement: supplementary_material [file attachment]

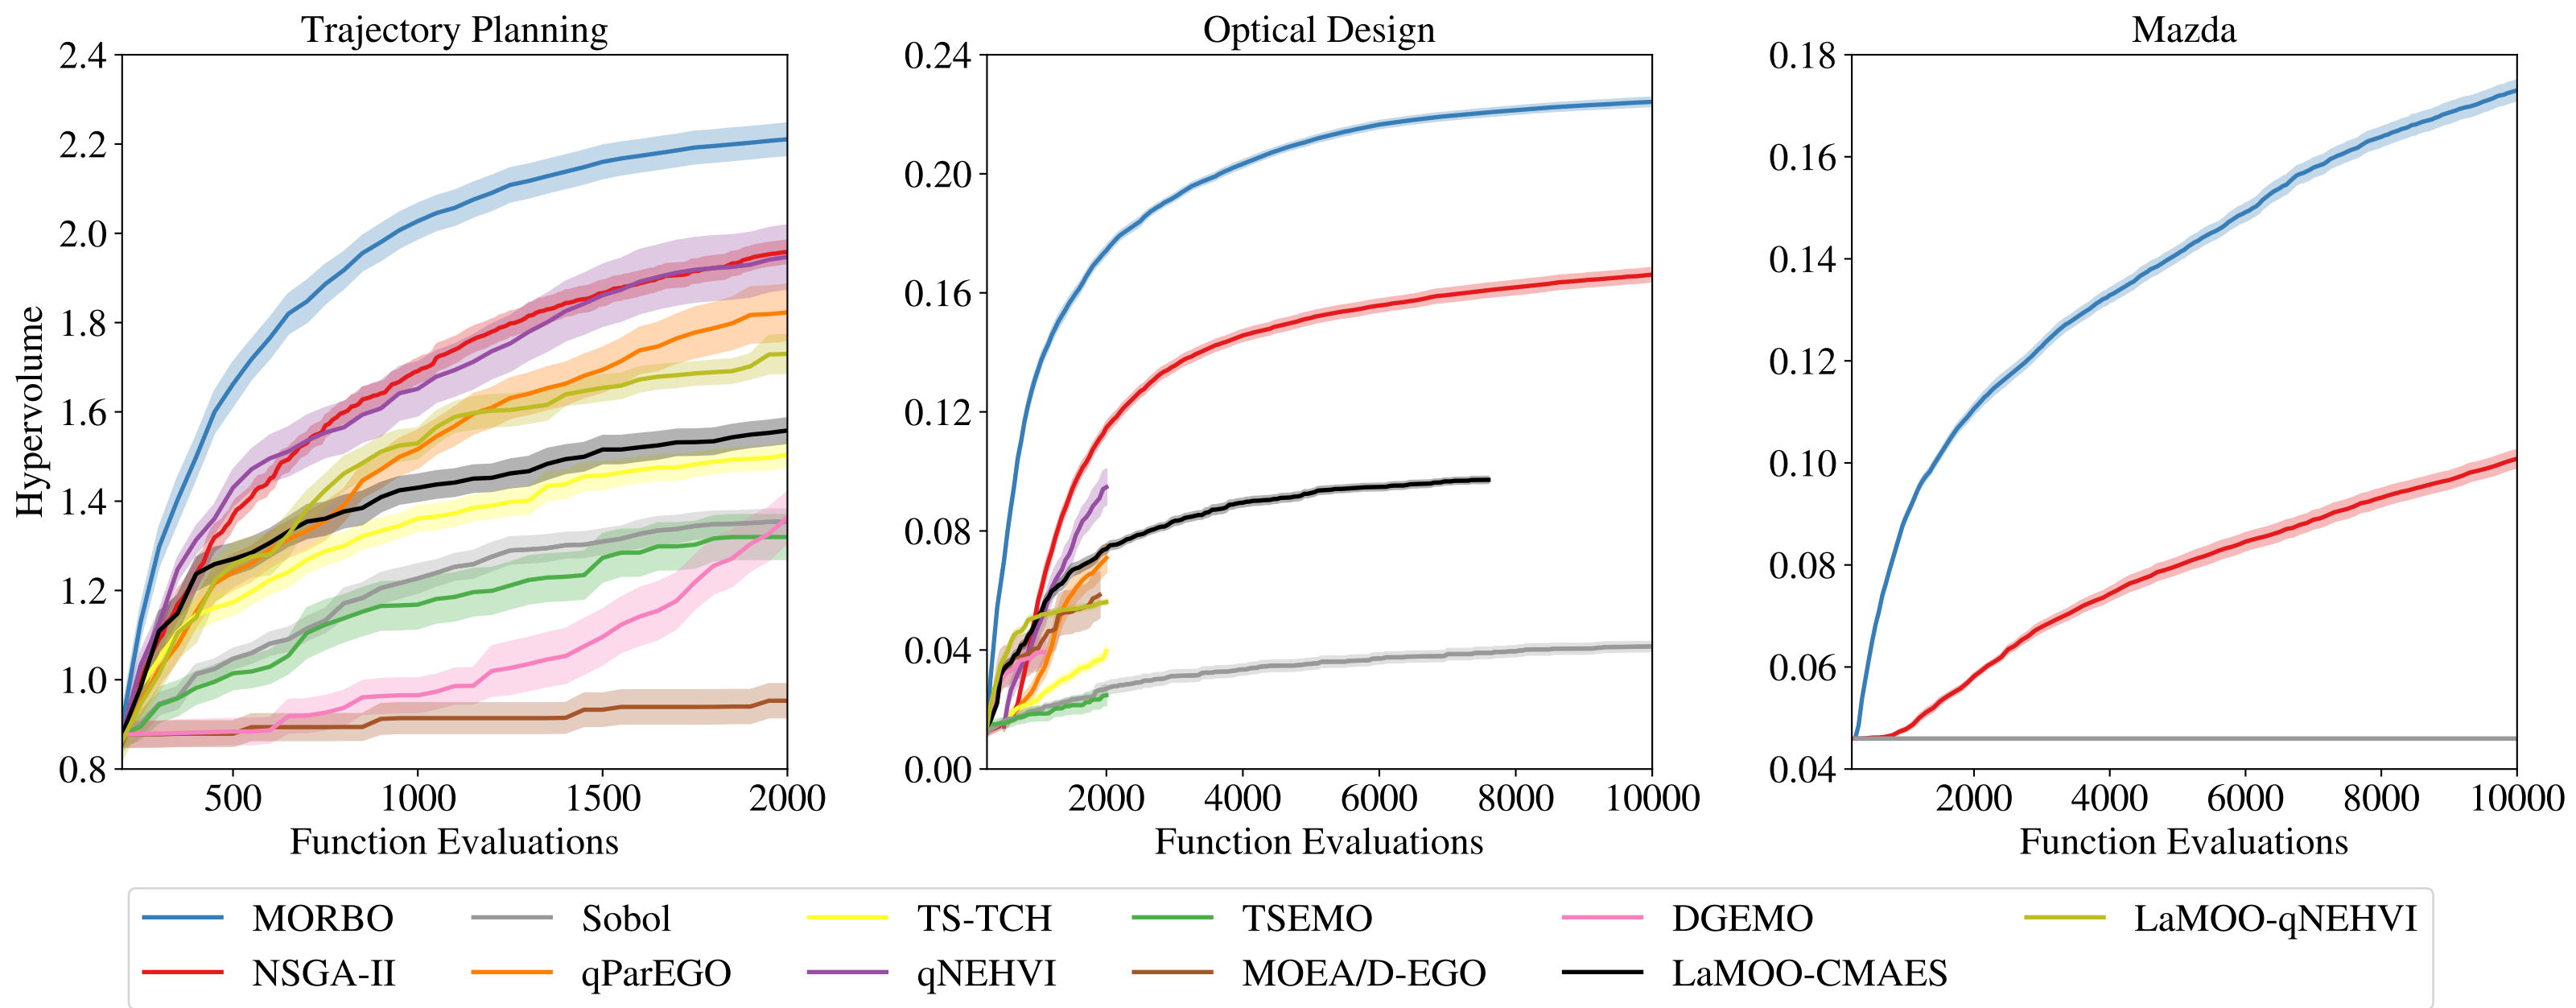

Supplement: supplementary_material [file attachment]

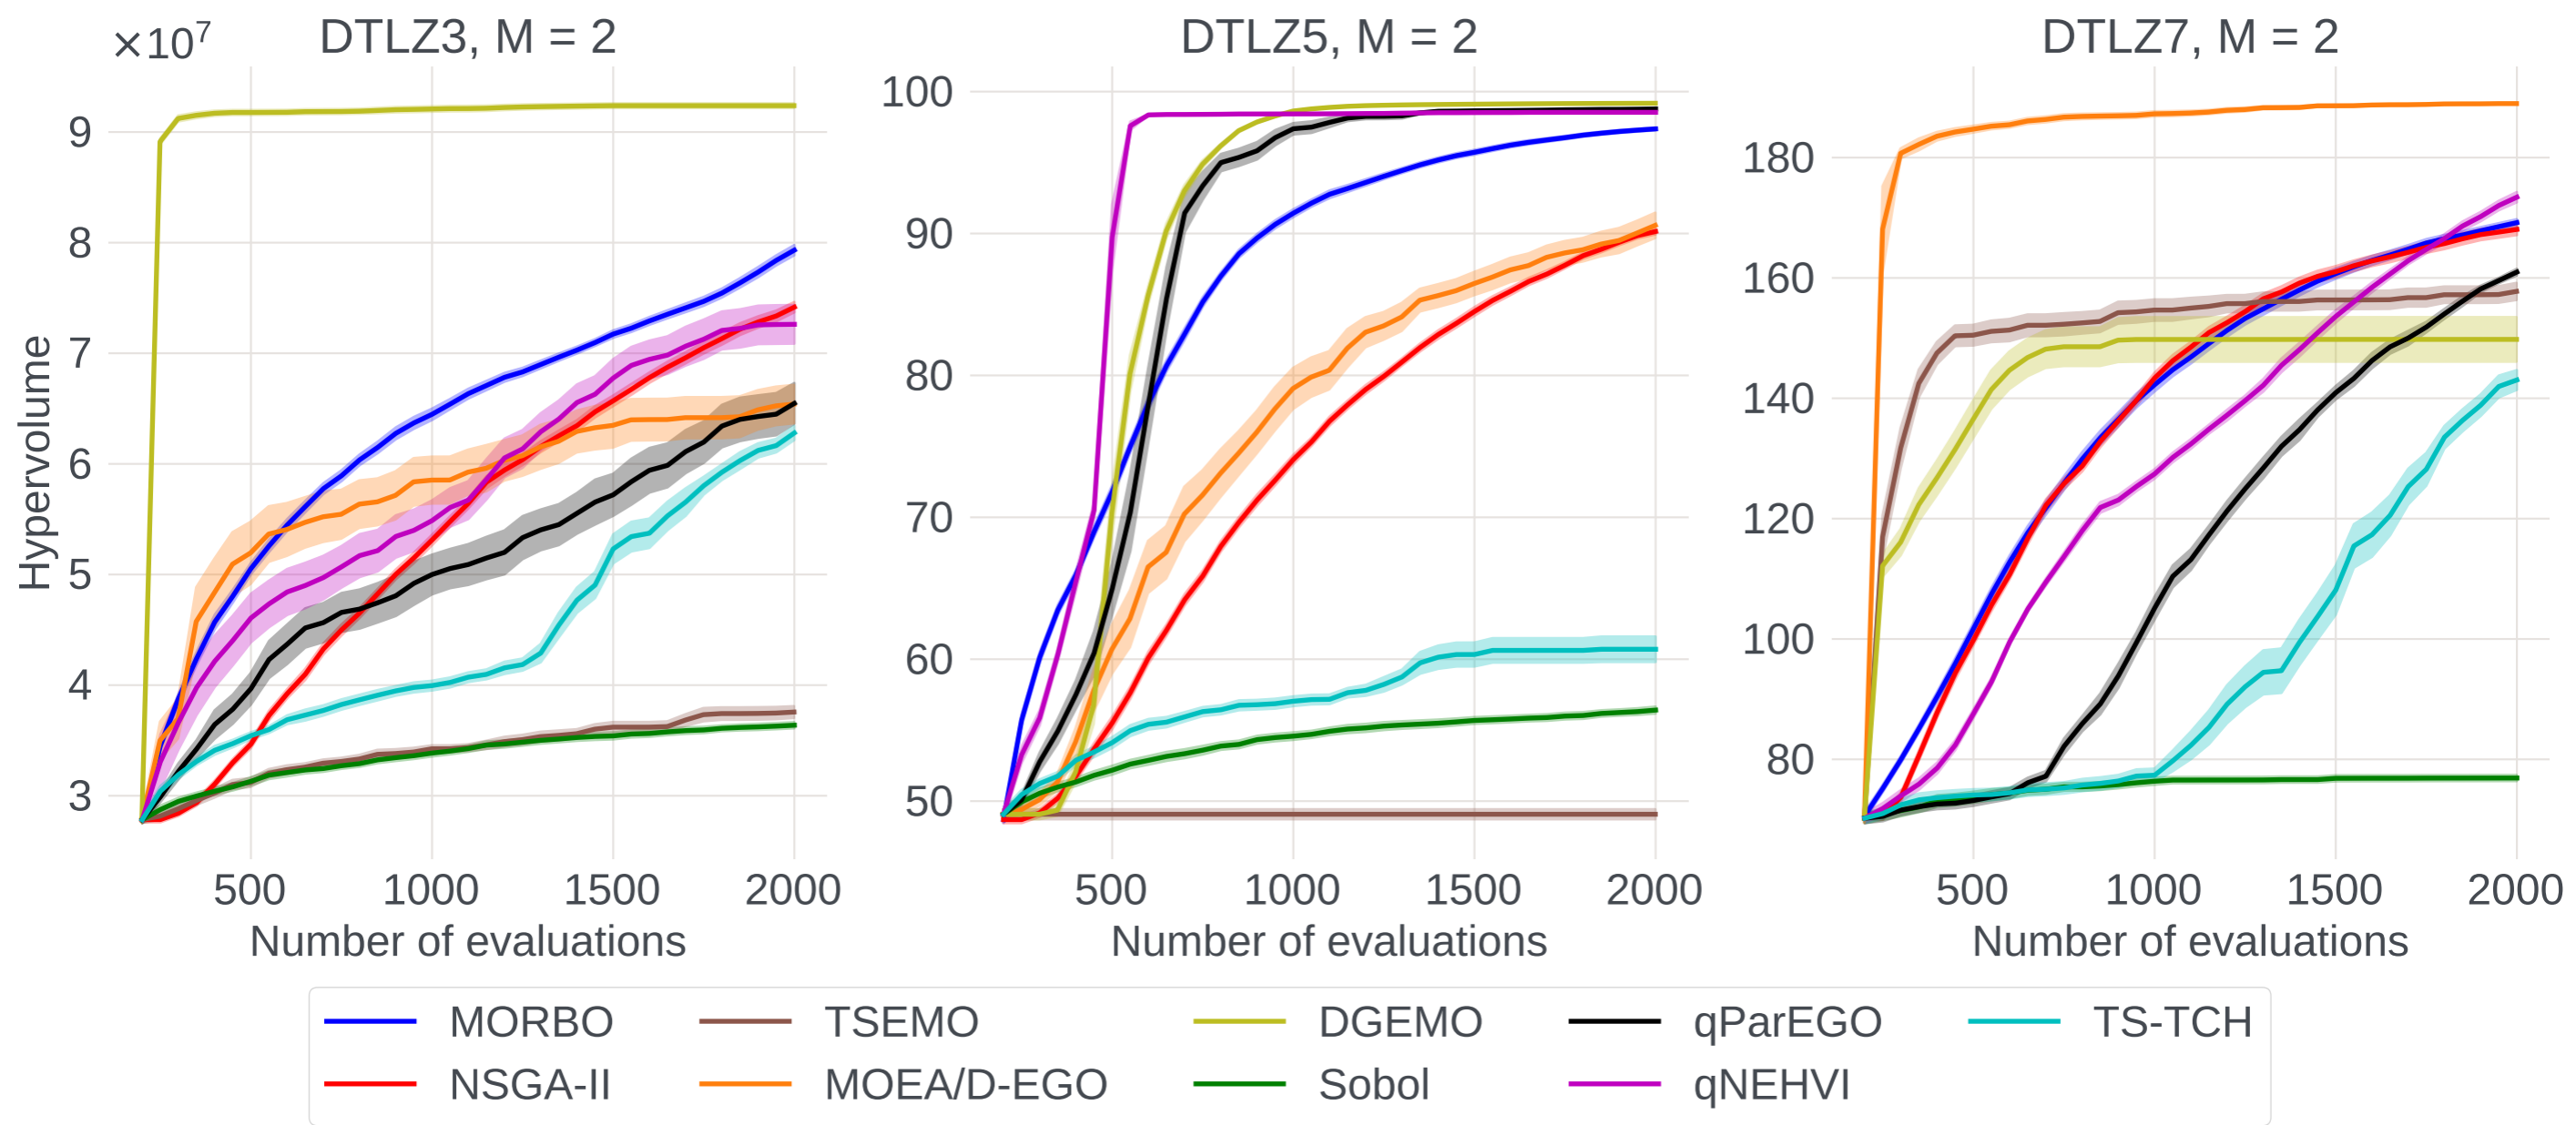

Supplement: supplementary_material [file attachment]

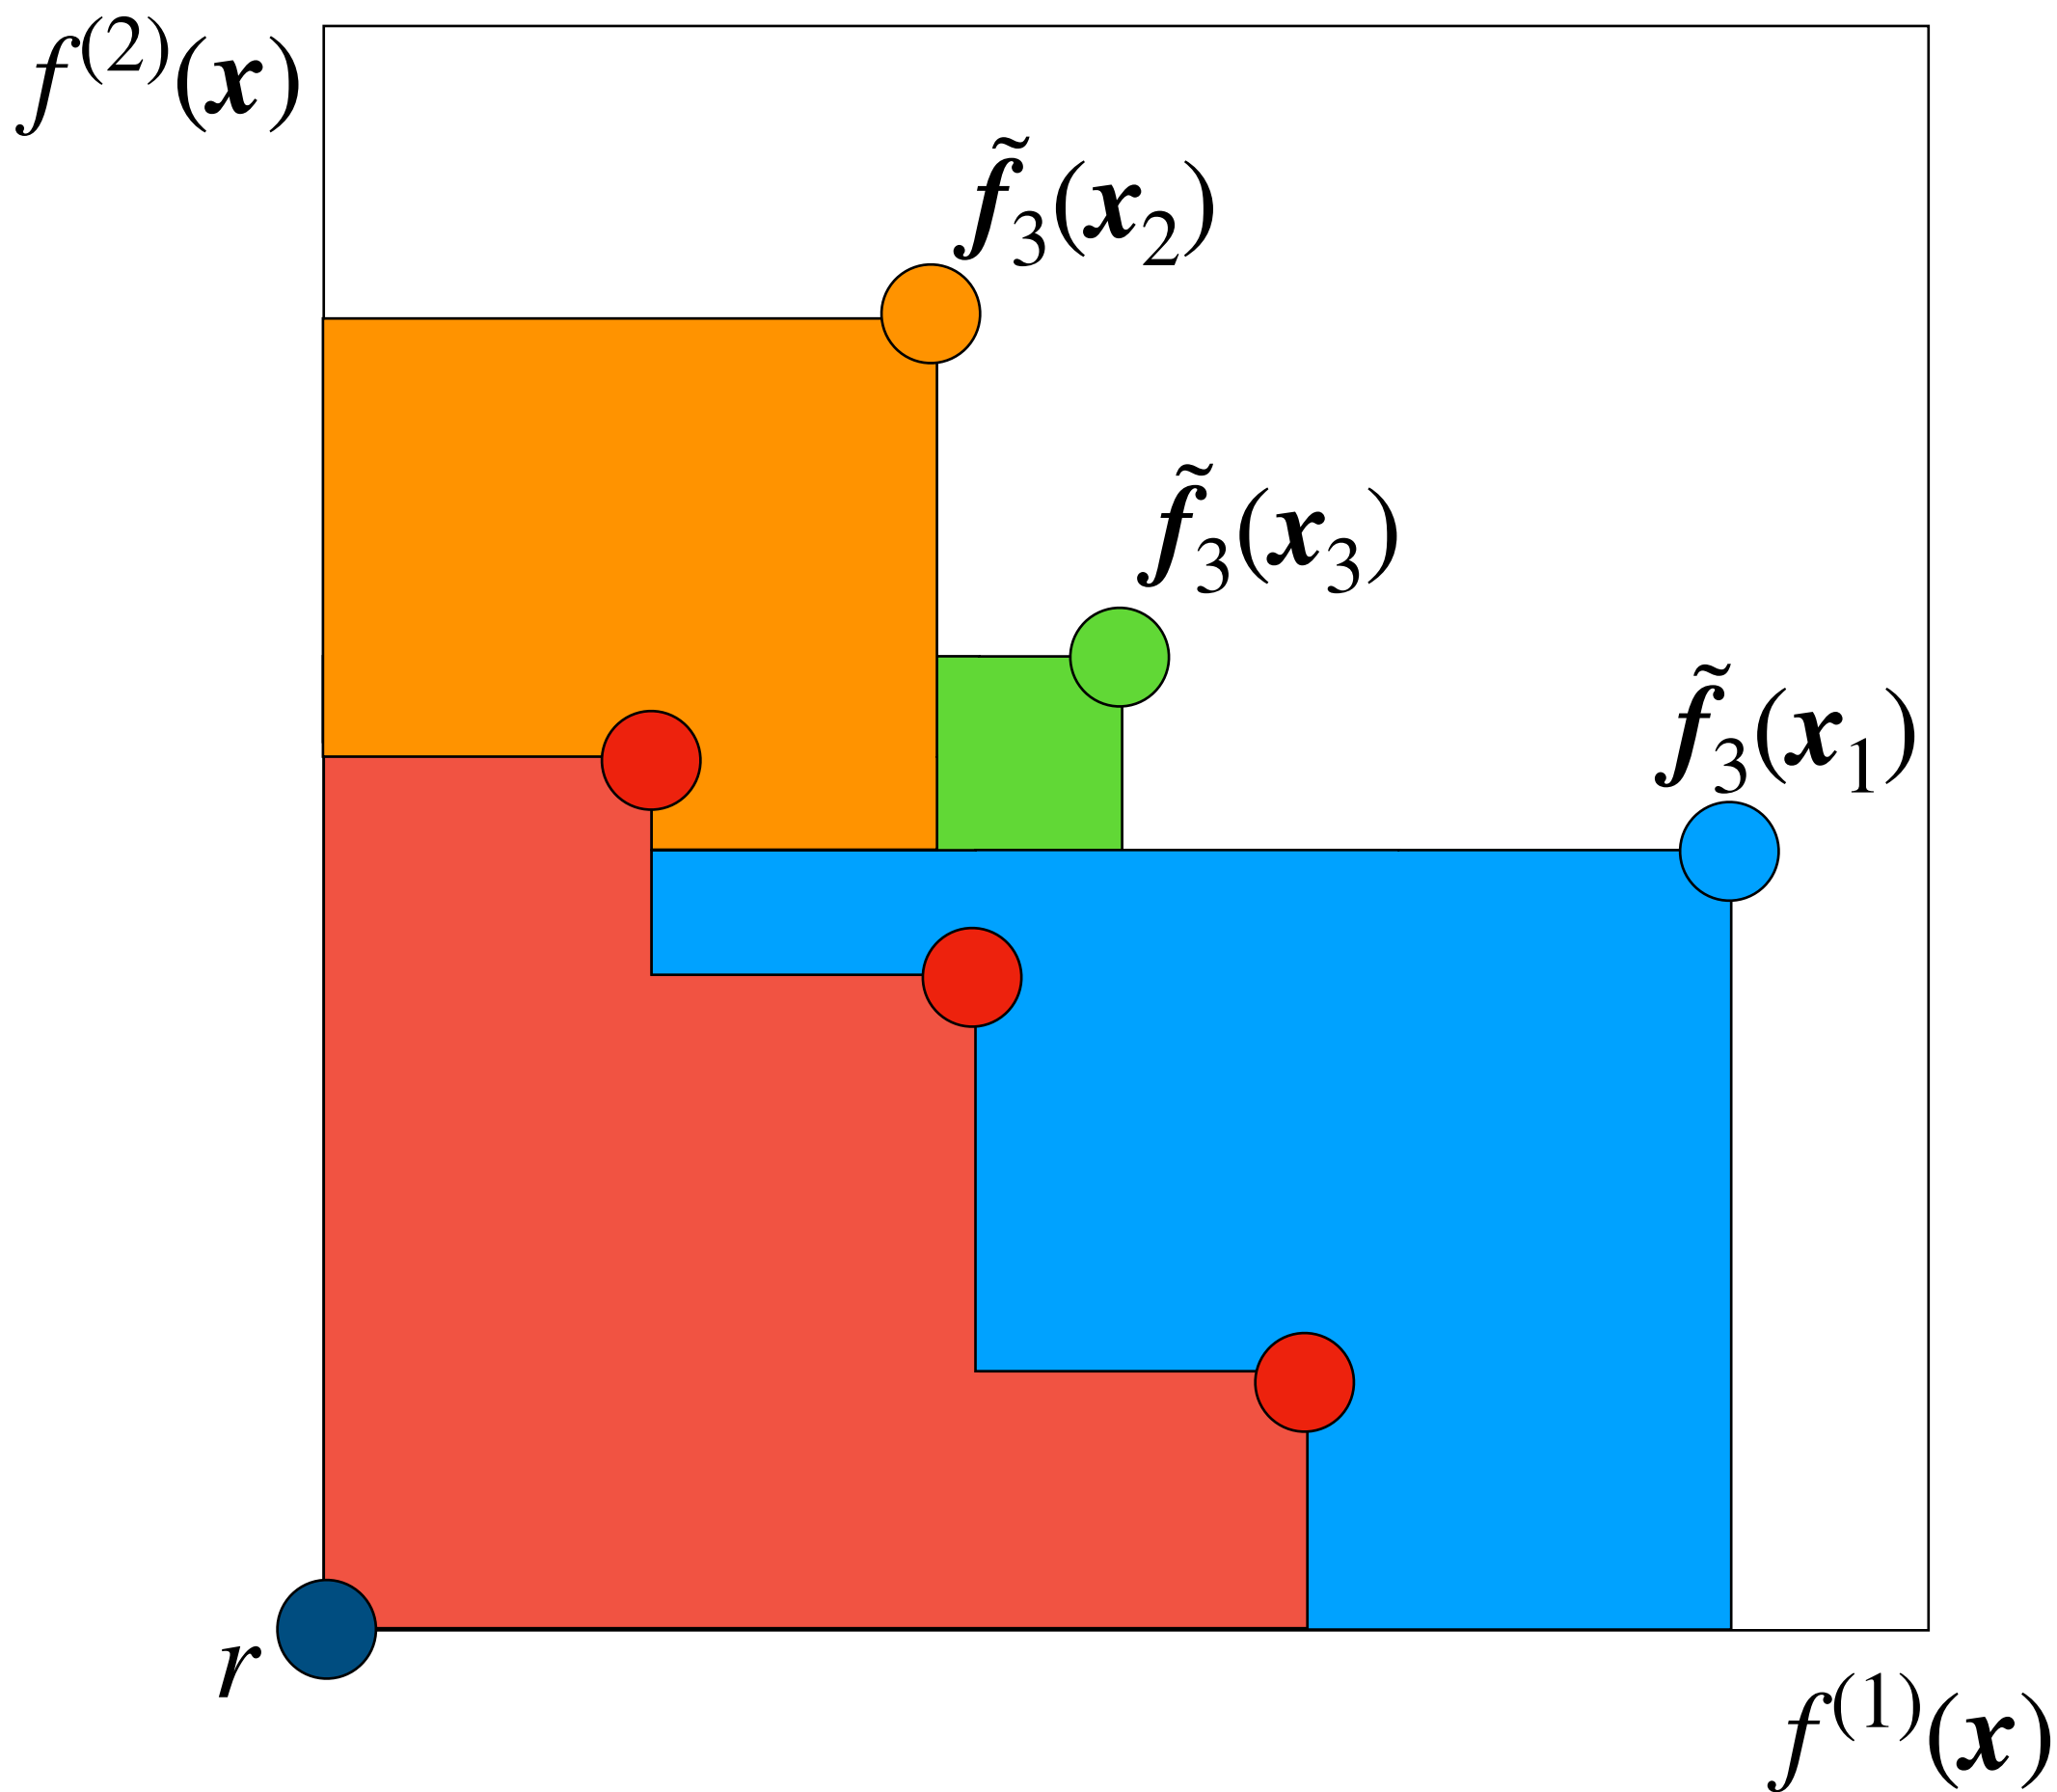

Supplement: supplementary_material [file attachment]

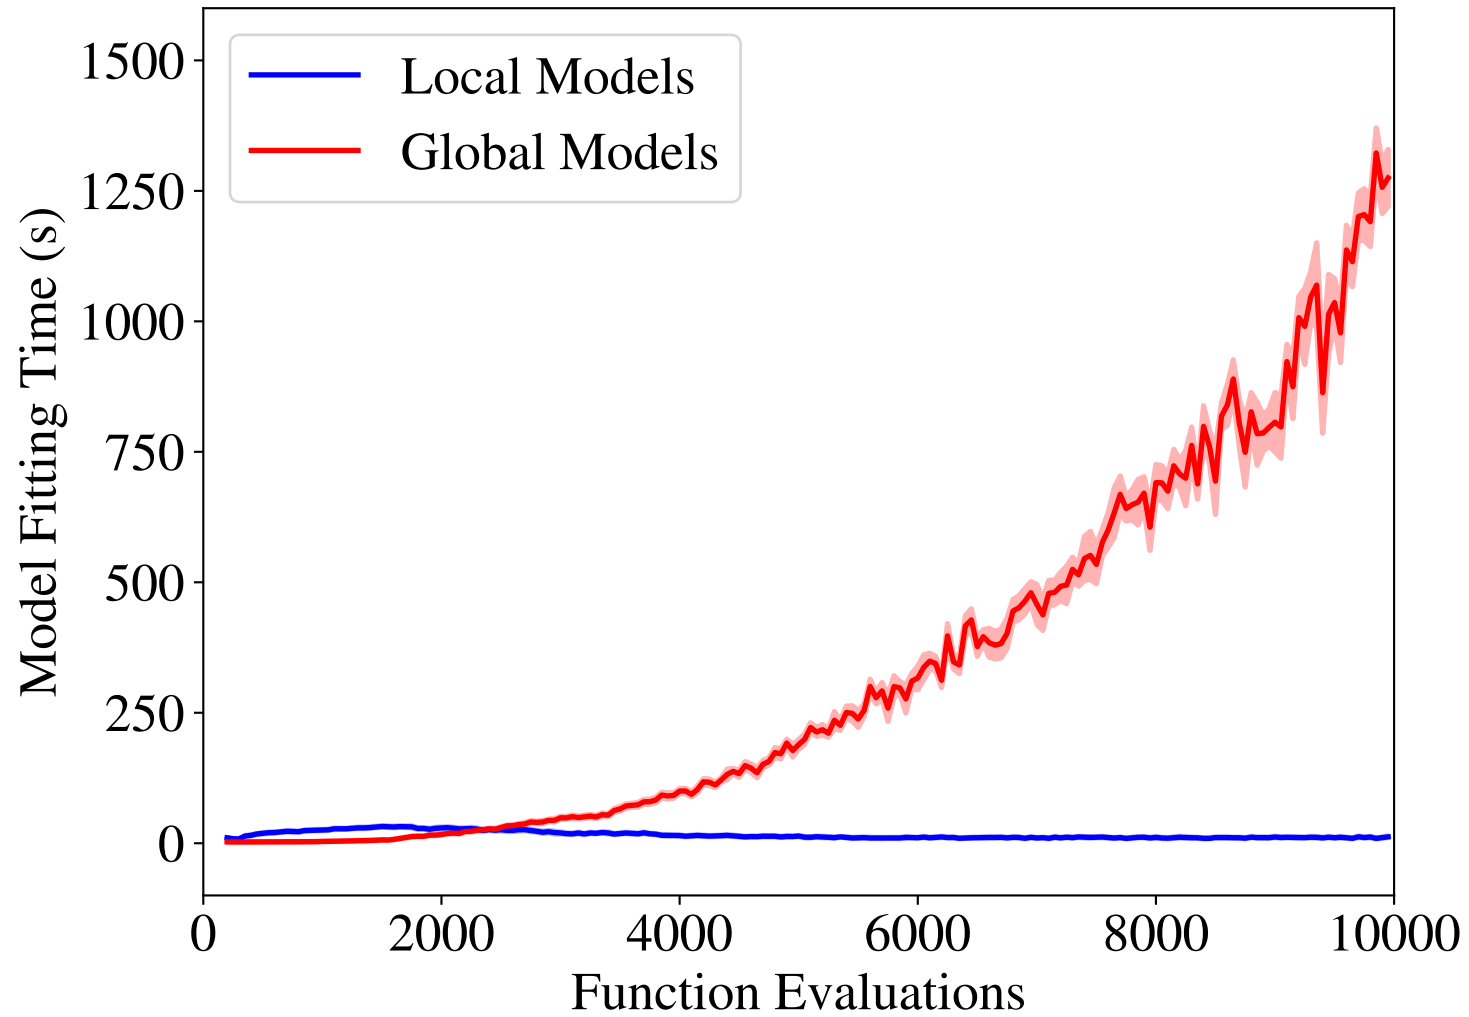

Supplement: supplementary_material [file attachment]

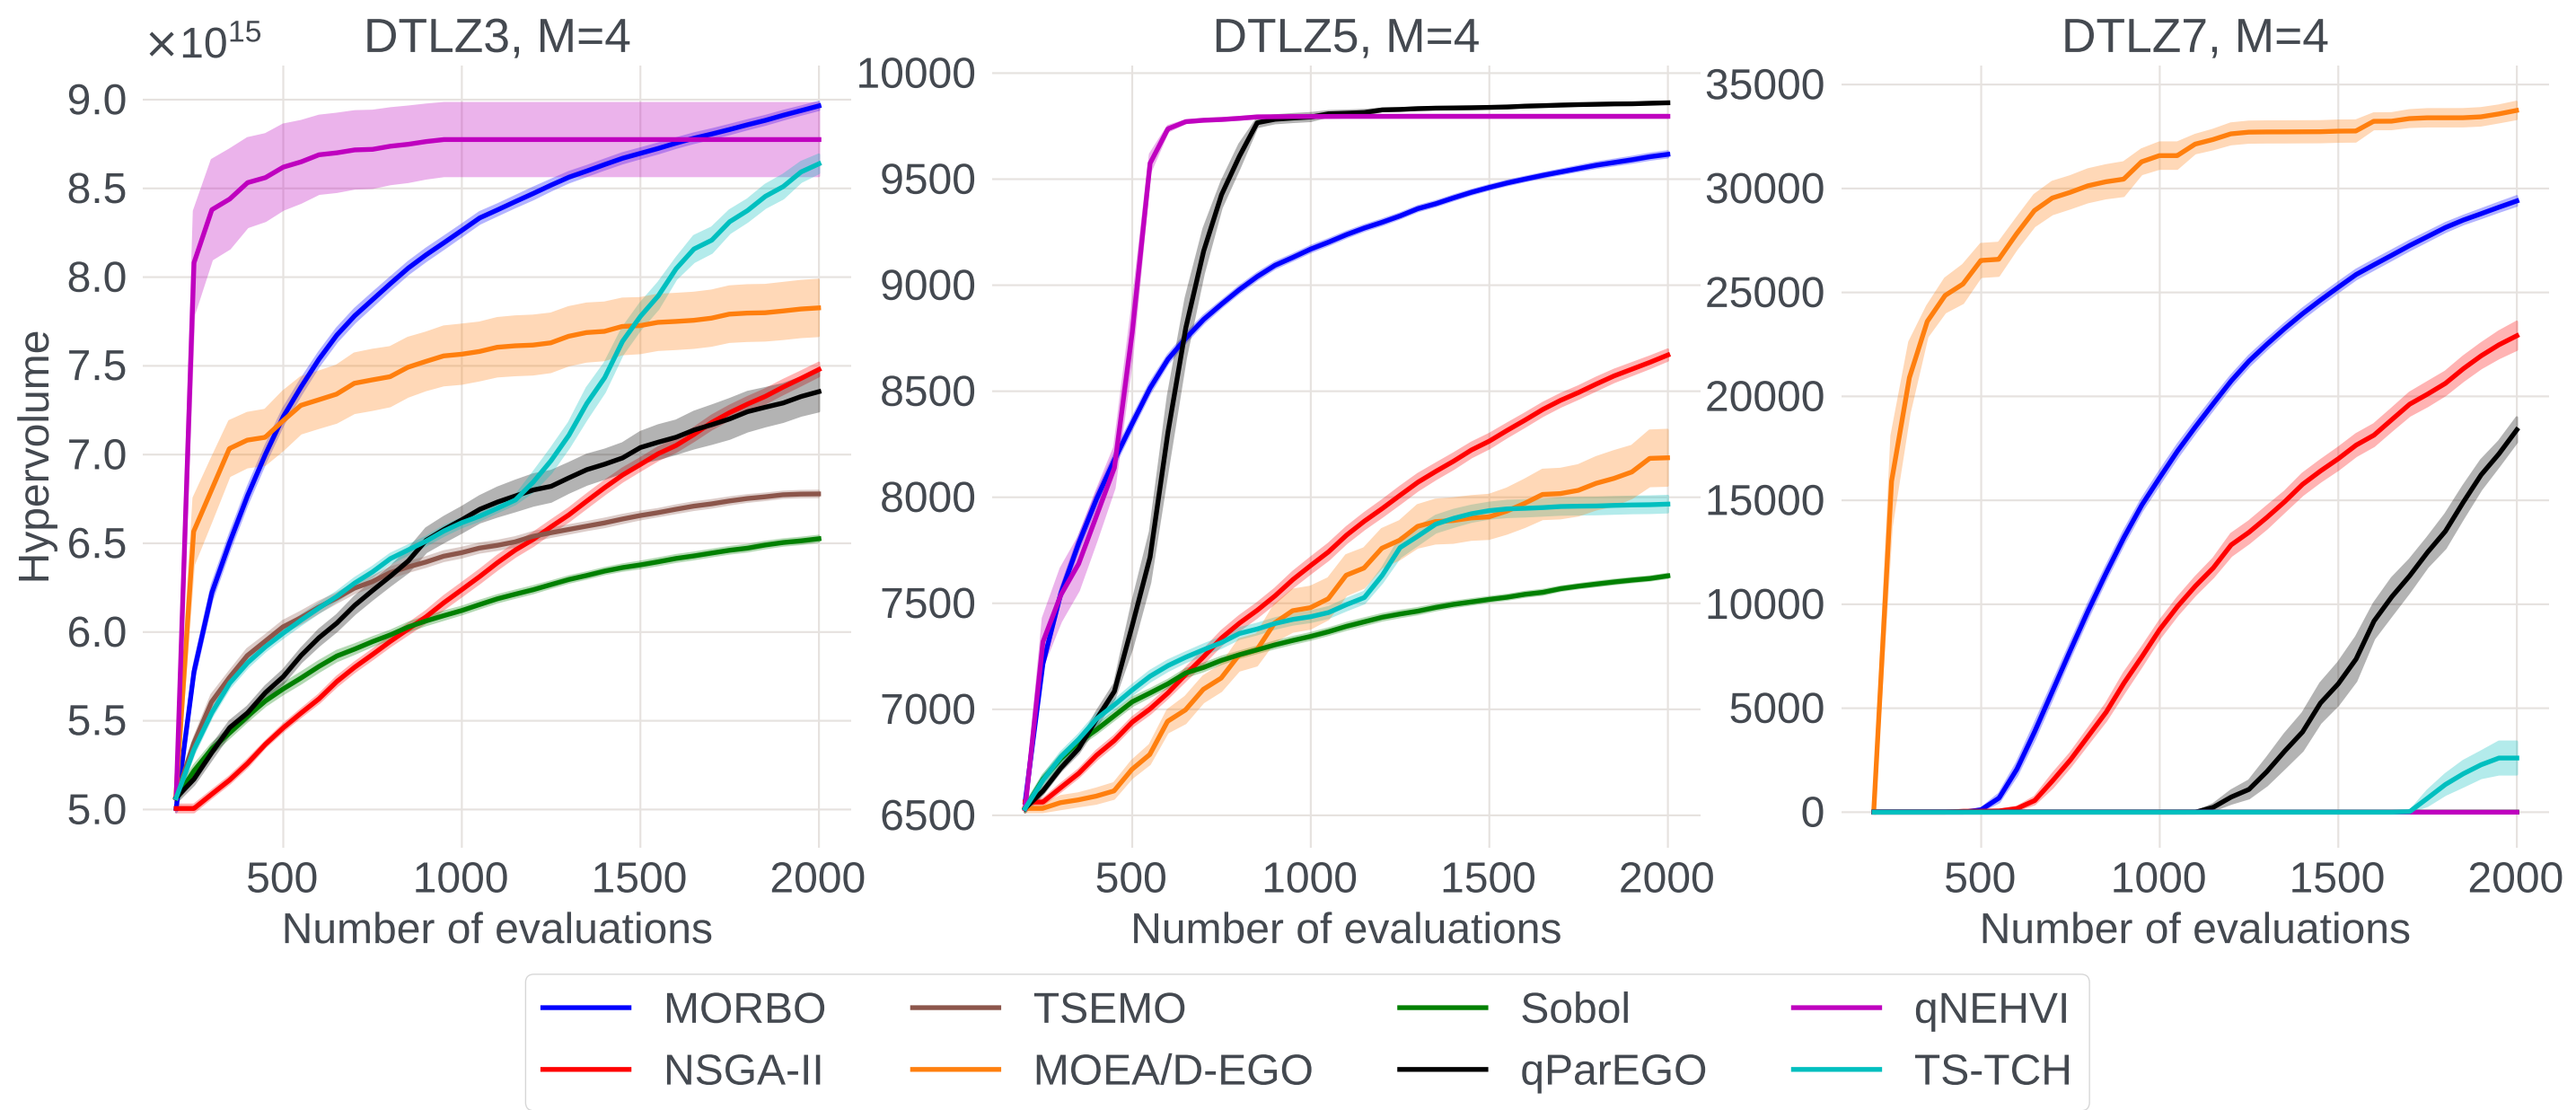

Supplement: supplementary_material [file attachment]

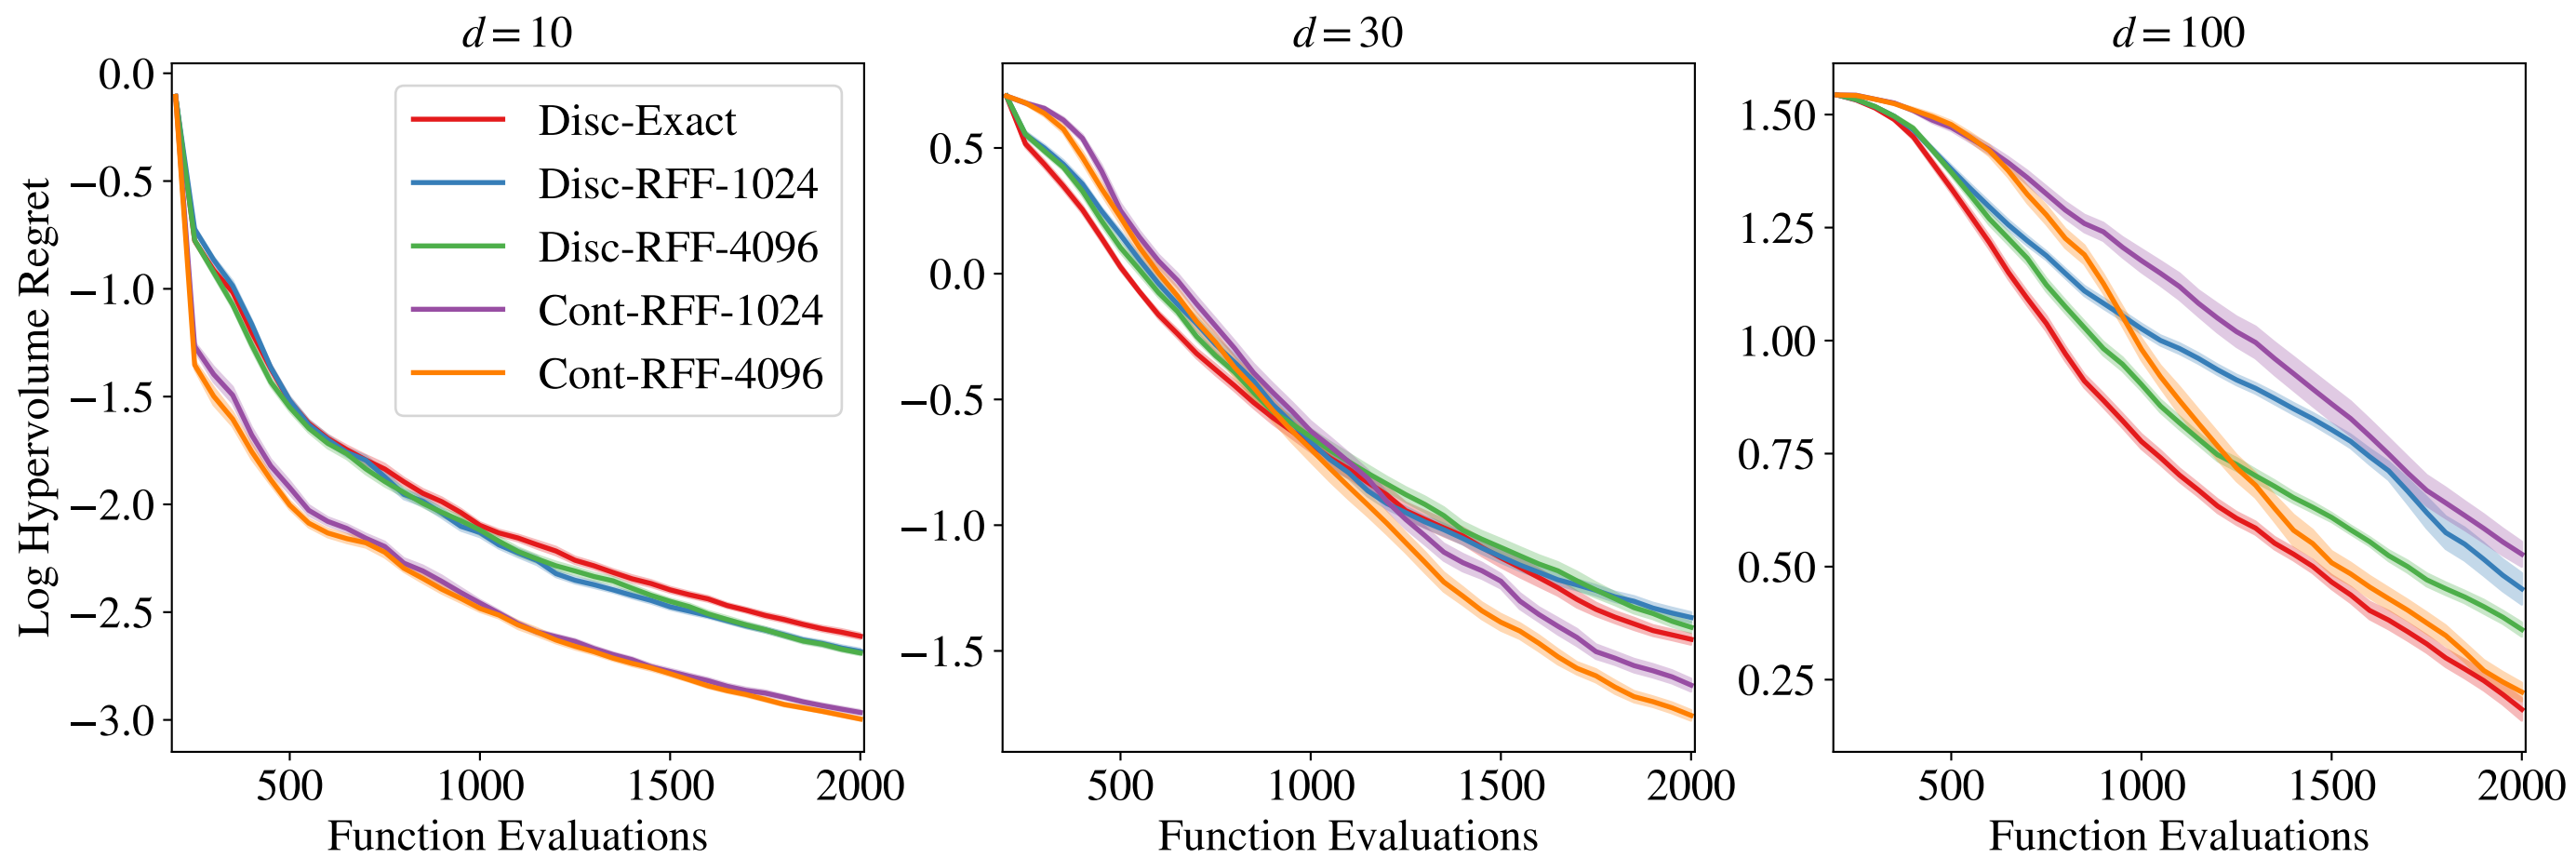

Supplement: supplementary_material [file attachment]
